# Supplementary material for: Genome-wide association study reveals mechanisms underlying dilated cardiomyopathy and myocardial resilience
Source: Nat Genet. 2024 Nov 21;56(12):2636–45. doi: 10.1038/s41588-024-01975-5 (PMC11631763; doi:10.1038/s41588-024-01975-5)
Supplement: Supplementary file 4 — Supplementary Tables 1–41. [file 41588_2024_1975_MOESM4_ESM.xlsx]

## Sheet: ST1 Datasets
Supplementary Table 1: Contributing datasets for DCM/NICM GWAS
Cohort	Country/region	PMID	Clinical DCM cohort	Clinical criteria for DCM	Biobank cohort	Biobank DCM definition	DCM cases	DCM controls	Biobank NICM definition	NICM cases	NICM controls
Garnier et al.	France, Germany, USA, Italy, and UK	33677556	YES	Clinician diagnosis by guidelines (PMID 26792875); reduced LVEF and enlarged LV by imaging; no obvious underlying pathology. See Supplementary Note for sub-cohort specific criteria.	NO	-	2651	4329	-	-	-
Meder et al.	Germany	23853074 (original dataset) 33495596 (reprocessed dataset, as used in the current manuscript)	YES	WHO guidelines; LVEF<45%; no relevant CAD	NO	-	909	2120	-	-	-
Amsterdam UMC (AUMC)	Netherlands	-	YES	Clinical genetics referral for DCM by cardiologist; chart review for DCM diagnosis; LVEF<50%	NO	-	783	6978	-	-	-
FinnGen	Finland	-	NO	-	YES	ICD10 I42.0; excluding antecedent acute coronary disease and/or revascularization	3550	419370	ICD10 I42.0 or I50.1; excluding antecedent acute coronary disease and/or revascularization	7142	419302
UK Biobank (UKB)	United Kingdom	-	NO	-	YES	ICD10 I42.0; excluding antecedent acute coronary disease and/or revascularization	1065	471341	ICD10 I42.0 or I50.1; ICD9 4281 excluding antecedent acute coronary disease and/or revascularization	5662	471341
Massachusetts General Brigham Biobank (MGB)	Massachusetts, USA	-	NO	-	YES	ICD10 I42.0; excluding any coronary artery disease	407	42230	ICD10-CM I42.0 or I50.1; excluding any coronary artery disease	674	42230
SUM							9365	946368		13478	932873
Note: More information can be found in the Supplementary Note. Abbreviations: PMID, pubmed identifier; DCM, dilated cardiomyopathy; NICM, nonischemic cardiomyopathy; ICD, international classification of disease

## Sheet: ST2 DS QCanalysis
Supplementary Table 2: Genotyping, quality control, imputation, and analysis models used for GWAS in each dataset
Cohort	Genotyping Array	Variant and sample QC prior to imputation					Imputation		Additional genotype and sample QC			GWAS methodology
		Variant missingness	Sample missingness	HWE P	MAF	Other QC procedures	N variants for imputation	Imputation methods	Additional sample QC before GWAS	Variant QC for inclusion in Meta	N variants included in Meta	Software; model	Covariates
Garnier et al.	Cases: HumanOmniexpress24 (small subset on HumanOmniExpressExome8-v1-2). Controls: Omni2.5 and OmniExpress (in various control cohorts, see PMID 26792875)	<1% (in batches and across batches)	<1% (in batches and across batches)	0.00001 (in batches and across batches)	>1% (in batches and across batches)	Removed samples that were genetic outliers by IBS; removed ambiguous SNPs	564742	Phasing and imputation using Mach and Minimac 2; 1000 Genomes phase 3 version 5 as reference panel	-	INFO>=0.5; MAF>=0.5%; INFO>0.8 if MAF<1%; INFO * MAF * N_cases * 2 >= 5; remove ambiguous SNPs	7333704	Mach2dat; logistic regression	Sex, PC1-12
Meder et al.	Cases: Affymetrix Human SNP Array 5.0. Controls: GeneChip Human Mapping 500K (KORA) and Human SNP Array 5.0 (POPGEN).	<5%	<5%	0.001 in cases; 0.05 in controls	>3%	-	292367	Phasing and imputation using SHAPEIT2 and IMPUTE2; 1000 Genomes Pilot and HapMap 3 as reference	-	R^2>=0.5; MAF>1%; R^2 * MAF * N_cases * 2 >= 5; remove ambiguous SNPs	1096543	SNPTEST v2.5-beta4; logistic regression	Age, sex, PC1-2
Amsterdam UMC (AUMC)	Cases: Illumina Global Screening Array. Controls: Illumina Global Screening Array (Dutch Twin Registry).	<2% in cases; <2% in controls; <2% overall	<2%	0.000001 in cases; 0.000001 in controls; 0.000001 overall	>0.5% in cases; >0.5% in controls	removed ambiguous SNPs; removed variants with differential missingness P<0.005 between cases and controls; removed samples with PC-adjusted heterozygosity >=5SD from mean; removed samples with discordance between self-reported and genetically inferred sex; removed genetically determined duplicates	373332	Michigan Imputation Server; TOPMed imputation panel r2	Removed genetic outliers by PCA	INFO>=0.5; MAF>=0.5%; INFO>0.8 if MAF<1%; INFO * MAF * N_cases * 2 >= 5; remove ambiguous SNPs	8248247	REGENIE v3.1.3; logistic regression with LOCO PRS; approximate Firth correction with back-computation of standard errors	Sex, PC1-12
FinnGen	New collections: FinnGen Thermo Fisher Axiom custom array. Legacy cohorts: Various Illumina and Affymetrix arrays.	<2% overall and <4% in 85% of batches	<2%	across batches: 1E-10; within each batch: 1E-6	>0.1% for imputation	Remove samples where genetic sex does not match provided sex from registries, samples with high heterozygosity (>3 standard deviations from the mean) in common variants (allele frequency > 0.05) per batch, and samples with excess relatedness to other samples (>0.1).	605219	Phasing with Eagle v2.3.5 and imputation with Beagle v4.1; SiSu v4 reference panel	Removed genetic outliers by PCA	INFO>=0.5; MAF>=0.5%; INFO>0.8 if MAF<1%; INFO * MAF * N_cases * 2 >= 5; remove ambiguous SNPs	12320660 (DCM); 12320762 (NICM)	REGENIE v2.2.4; logistic regression with LOCO PRS; approximate Firth correction with back-computation of standard errors	Sex, age at death or end of follow-up, PC1-10, genotyping array, genotyping batch
UK Biobank (UKB)	UK Biobank Axiom array; UK BiLEVE Axiom	5	-	1e-12	>1%	-	670739	Phasing and imputation using SHAPEIT3 and IMPUTE4; HRC r1.1 + UK10K as reference panel	Removed samples with discordance between self-reported and genetic sex; removed samples with putative sex chromosome aneuploidy; removed samples that were outliers for missingness or heterozygosity	INFO>=0.5; MAF>=0.5%; INFO>0.8 if MAF<1%; INFO * MAF * N_cases * 2 >= 5; remove ambiguous SNPs	11123724 (DCM); 14120114 (NICM)	REGENIE v3.1.3; logistic regression with LOCO PRS; approximate Firth correction with back-computation of standard errors	Sex, age, age^2, batch, PC1-4, PCs from 5-20 if associated with DCM/NICM
Massachusetts General Brigham Biobank (MGB)	Illumina Global Screening Array	<2%	-	1e-06	MAC>2	Removed variants with discordant MAF with gnomAD (X^2>=300)	563449	Michigan Imputation Server; TOPMed imputation panel r2	Removed samples with discordance between self-reported and genetic sex; removed samples with putative sex chromosome aneuploidy; removed samples that were outliers for missingness or heterozygosity; removed samples with discordance between array and exome sequencing calls	INFO>=0.5; MAF>=0.5%; INFO>0.8 if MAF<1%; INFO * MAF * N_cases * 2 >= 5; remove ambiguous SNPs	9180888 (DCM); 10757106 (NICM)	REGENIE v3.1.3; logistic regression with LOCO PRS; approximate Firth correction with back-computation of standard errors	Sex, age, age^2, batch, PC1-4, PCs from 5-20 if associated with DCM/NICM
Note: More information can be found in the Supplementary Note. Abbreviations: PMID, pubmed identifier; QC, quality control; GWAS, genome-wide association study; DCM, dilated cardiomyopathy; NICM, nonischemic cardiomyopathy; IBS, indentity-by-state; INFO, impuattion accuracy score; MAF, minor allele frequency; PCA, principal component analysis; LOCO, leave-one-chromosome-out; PRS, polygenic risk s…

## Sheet: ST3 Amsterdam cohort charact
Supplementary Table 3: Baseline characteristics of DCM cases from Amsterdam cohort
All individuals					European ancestry
Sample size, N	978				Sample size, N	783
Sex, N male (%)	560	57.3 %			Sex, N male (%)	452	0.577
Positive family history relevant to DCM (in the 1st and 2nd degree relatives), N (%)	456	0.529			Positive family history relevant to DCM (in the 1st and 2nd degree relatives), N (%)	372	0.538
Mortality, N (%)	60	0.062			Mortality, N (%)	40	0.051
European ancestry, N (%)	783	0.800613			European ancestry, N (%)	783	1
Age at molecular diagnosis, years (median [IQR])	57	[48.00, 65.00]			Age at molecular diagnosis, years (median [IQR])	58	[49.00, 65.25]
Worst extracted LVEF, % (median [IQR])	28	[20.00, 37.00]			Worst extracted LVEF, % (median [IQR])	28.89	[20.00, 37.00]
Genotype positive, N (%)	193	19.7%			Genotype positive, N (%)	162	20.7%
TTN PLP, N (%)	119	12.2%			TTN PLP, N (%)	103	13.2%
PLN PLP, N (%)	18	1.8%			PLN PLP, N (%)	17	2.2%
FLNC PLP, N (%)	16	1.6%			FLNC PLP, N (%)	14	1.8%
LMNA PLP, N (%)	12	1.2%			LMNA PLP, N (%)	10	1.3%
DSP PLP, N (%)	9	0.9%			DSP PLP, N (%)	5	0.6%
RBM20 PLP, N (%)	7	0.7%			RBM20 PLP, N (%)	5	0.6%
MYH7 PLP, N (%)	5	0.5%			MYH7 PLP, N (%)	3	0.4%
BAG3 PLP, N (%)	3	0.3%			BAG3 PLP, N (%)	2	0.3%
SCN5A PLP, N (%)	2	0.2%			SCN5A PLP, N (%)	2	0.3%
TNNT2 PLP, N (%)	2	0.2%			TNNT2 PLP, N (%)	1	0.1%
Possible causative genotype, N (%)	8	0.8%			Possible causative genotype, N (%)	6	0.8%
TNNI3 PLP, N (%)	3	0.3%			NEXN PLP, N (%)	3	0.4%
NEXN PLP, N (%)	3	0.3%			TNNI3 PLP, N (%)	2	0.3%
TPM1 PLP, N (%)	2	0.2%			TPM1 PLP, N (%)	1	0.1%
Uncertain genotype, N (%)	483	49.4%			Uncertain genotype, N (%)	371	47.4%
VUS, N (%)	463	47.3%			VUS, N (%)	354	45.2%
PLP non-DCM gene, N (%)	20	2%			PLP non-DCM gene, N (%)	17	2.2%
Genotype negative, N (%)	294	30.1%			Genotype negative, N (%)	244	31.2%
Note: The left section shows the baseline characteristics for all DCM cases from the Amsterdam cohort, while the right section shows data for the homogeneous European subset that was used for GWAS. N, sample size; DCM, dilated cardiomyopathy; IQR, interquartile range; LVEF, left ventricular ejection fraction; PLP, pathogenic or likely pathogenic variant; VUS, variant of uncertain significance

## Sheet: ST4 LDSC h2
Supplementary Table 4: Single nucleotide polymorphism based heritability and LD Score regression intercepts for different DCM/NICM meta-analyses estimated using LDSC
Phenotype	Lambda_GC	LDSC_intercept	LDSC_intercept_se	Liability_scale_h2	Liability_scale_h2_se
GWAS-DCM (Garnier_Meder_Amsterdam_FinnGen_UKB_MGB)	1.1876	1.0617	0.0079	0.142	0.0127
Clinical DCM (Garnier_Meder_Amsterdam)	1.2201	1.1286	0.0076	0.1635	0.018
NI-DCM (FinnGen_UKB_MGB)	1.1207	1.0289	0.0077	0.1406	0.0157
NICM (FinnGen_UKB_MGB)	1.127	1.0346	0.0084	0.0691	0.0074
MTAG-DCM	1.1619	0.9939	0.0102	N/A	N/A
Note: GC, genomic control; LDSC, Linkage disequilibrium score regression; se, standard error; h2, heritability; GWAS-DCM, gwas meta-analysis for DCM across biobank and clinical cohorts; NI-DCM, non-ischemic cardiomyopathy defined in biobanks; NICM, nonischemic cardiomyopathy from biobanks; MTAG-DCM, mtag results incorporating GWAD-DCM with LV GWAS data

## Sheet: ST5 LDSC rg
Supplementary Table 5: Genetic correlations between NI-DCM and NICM meta-analyses estimated using LDSC
Phenotype 1	Phenotype 2	rg	se	z	p	h2_obs	h2_obs_se	h2_int	h2_int_se	gcov_int	gcov_int_se
GWAS-DCM (Garnier_Meder_Amsterdam_FinnGen_UKB_MGB)	Clinical DCM (Garnier_Meder_Amsterdam)	1.0253	0.0306	33.4863	7.63e-246	0.3162	0.0338	1.1285	0.0077	0.626	0.007
GWAS-DCM (Garnier_Meder_Amsterdam_FinnGen_UKB_MGB)	NICM (FinnGen_UKB_MGB)	0.9346	0.0301	31.0325	1.97e-211	0.007	0.0007	1.0314	0.0079	0.5216	0.0065
GWAS-DCM (Garnier_Meder_Amsterdam_FinnGen_UKB_MGB)	NI-DCM (FinnGen_UKB_MGB)	0.8731	0.0176	49.5766	0	0.0068	0.0008	1.0266	0.0078	0.8537	0.0076
GWAS-DCM (Garnier_Meder_Amsterdam_FinnGen_UKB_MGB)	MTAG-DCM (Ecc_global_LVESVi_processed)	0.9604	0.0144	66.7767	0	2.2159	0.2108	0.9814	0.0128	0.7268	0.009
Clinical DCM (Garnier_Meder_Amsterdam)	NICM (FinnGen_UKB_MGB)	0.761	0.0739	10.3028	6.84e-25	0.007	0.0007	1.0319	0.0082	-0.0014	0.0051
Clinical DCM (Garnier_Meder_Amsterdam)	NI-DCM (FinnGen_UKB_MGB)	0.7296	0.0699	10.4327	1.76e-25	0.0068	0.0008	1.0262	0.0082	-0.0023	0.0053
Clinical DCM (Garnier_Meder_Amsterdam)	MTAG-DCM (Ecc_global_LVESVi_processed)	0.8643	0.0378	22.8669	9.93e-116	2.2073	0.208	0.9823	0.0126	0.4346	0.0072
NI-DCM (FinnGen_UKB_MGB)	MTAG-DCM (Ecc_global_LVESVi_processed)	0.9141	0.0253	36.0735	5.91e-285	2.2094	0.211	0.9825	0.0128	0.5851	0.0084
NI-DCM (FinnGen_UKB_MGB)	NICM (FinnGen_UKB_MGB)	1.027	0.0301	34.1291	2.73e-255	0.0068	0.0007	1.0343	0.0084	0.6292	0.0068
NICM (FinnGen_UKB_MGB)	MTAG-DCM (Ecc_global_LVESVi_processed)	0.8424	0.0335	25.1465	1.54e-139	2.2096	0.211	0.9824	0.0128	0.3635	0.0073
Note: P-values are derived from bivariate LD score regression. P-values are two-sided and unadjusted for multiple testing. Abvreviations: LDSC, Linkage disequilibrium score regression; se, standard error; z, Z-score; rg, genetic correlation; h2, heritability; gcov, genetic covariance; int, intercept; GWAS-DCM, gwas meta-analysis for DCM across biobank and clinical cohorts; NI-DCM, non-ischemic ca…

## Sheet: ST6 GWAS-DCM lociannot
Supplementary Table 6: Genome-wide significant loci from GWAS-DCM with annotations and gene prioritization
LeadSNP	Variant #	Locus #	LeadSNP variant ID (chr:pos:ref:alt)	chr	pos (GRCh37)	P-value	NEA	EA	MAF	BETA	SE	Nearest_Gene (FUMA)	Function	CADD	Protein-altering							OpenTargets V2F					PoPS						eQTL/pQTL MR+coloc		Priortized gene in locus	Tied gene (equal prio score)
															Annotation	Gene	exonic function	exon	LD with protein-altering	protein-altering summary	protein-altering gene	Closest gene	Closest coding gene	V2F #1	V2F #2	V2F #3	PoPS #1	PoPS #1 score	PoPS #2	PoPS #2 score	PoPS #3	PoPS #3 score	MODERATE coloc	STRONG coloc
rs2503715	1	1	1:2144107:A:G	1	2144107	3.475e-08	A	G	0.1769	-0.1425	0.0258	C1orf86:AL590822.1:RP11-181G12.4	ncRNA_intronic	20.3	NA	NA	NA	NA	0	NA	NA	FAAP20	FAAP20	FAAP20	RER1	MORN1	SKI	1.17714	PEX10	0.300481	PRKCZ	0.270872			SKI	FAAP20
rs1763605	2	2	1:16338925:G:T	1	16338925	8.608e-37	T	G	0.3221	0.234	0.0185	HSPB7	intergenic	6.454	NA	NA	NA	NA	0	NA	NA	CLCNKA	CLCNKA	CLCNKA	HSPB7	CLCNKB	HSPB7	1.44589	EPHA2	0.768879	SPEN	0.656558			HSPB7	-
rs12743512	3	3	1:45954033:A:G	1	45954033	5.232e-09	G	A	0.4761	0.0968	0.0166	TESK2	intronic	5.529	NA	NA	NA	NA	0	NA	NA	TESK2	TESK2	MUTYH	AKR1A1	PRDX1	AKR1A1	0.64211	MAST2	0.277174	PRDX1	0.26753	AKR1A1		AKR1A1	-
rs76166750	4	4	1:50840676:A:G	1	50840676	2.519e-08	G	A	0.04473	0.2469	0.0443	HMGB1P45	intergenic	0.274	NA	NA	NA	NA	0	NA	NA	DMRTA2	DMRTA2	DMRTA2	AGBL4	ELAVL4	AGBL4	0.0399963	ELAVL4	0.0221412	DMRTA2	-0.0929866			DMRTA2	-
rs2474370	5	5	1:61886891:C:T	1	61886891	1.364e-12	C	T	0.3141	-0.1355	0.0191	NFIA	intronic	5.432	NA	NA	NA	NA	0	NA	NA	TM2D1	TM2D1	PATJ	TM2D1	NFIA	TM2D1	-0.0255619	INADL	-0.0622729	-	-			TM2D1	-
rs4659701	6	6	1:236853167:A:G	1	236853167	1.641e-15	G	A	0.3757	0.1414	0.0177	ACTN2	intronic	11.43	NA	NA	NA	NA	0	NA	NA	ACTN2	ACTN2	ACTN2	LGALS8	HEATR1	ACTN2	3.73735	RYR2	0.79726	LGALS8	0.337238			ACTN2	-
rs2049367	7	7	2:36668219:A:C	2	36668219	9.732e-13	C	A	0.2942	0.1269	0.0178	CRIM1	intronic	2.598	NA	NA	NA	NA	0	NA	NA	CRIM1	CRIM1	FEZ2	CRIM1	VIT	CRIM1	1.581	VIT	0.132847	FEZ2	0.0959046		CRIM1	CRIM1	-
rs2540926	8	7	2:37090897:A:G	2	37090897	7.152e-11	G	A	0.4533	0.1149	0.0176	STRN	intronic	2.436	NA	NA	NA	NA	1	NA	NA	STRN	STRN	STRN	EIF2AK2	VIT	QPCT	0.430994	STRN	0.365523	EIF2AK2	0.284917			CRIM1	-
rs2540277	9	8	2:103426177:C:T	2	103426177	2.665e-08	C	T	0.04871	0.1918	0.0345	TMEM182	intronic	0.771	NA	NA	NA	NA	0	NA	NA	TMEM182	TMEM182	MFSD9	TMEM182	IL1RL1	IL18R1	0.308015	TMEM182	0.254037	SLC9A2	0.144845		TMEM182	TMEM182	-
rs525576	10	9	2:159973446:C:T	2	159973446	1.839e-08	T	C	0.1004	-0.1509	0.0268	TANC1	intronic	0.342	NA	NA	NA	NA	0	NA	NA	TANC1	TANC1	TANC1	CD302	WDSUB1	TANC1	0.180973	BAZ2B	0.165292	WDSUB1	-0.270556			TANC1	-
rs16866400	11	10	2:179448911:A:G	2	179448911	4.735e-13	G	A	0.2147	-0.1507	0.0208	TTN-AS1:TTN	ncRNA_intronic	0.409	NA	NA	NA	NA	1	TTN:nonsynonymous SNV (2:179430997:A:G,r2=0.737682); TTN:nonsynonymous SNV (2:179444939:C:T,r2=0.812493); TTN:nonsynonymous SNV (2:179451420:A:G,r2=0.801754); TTN:nonsynonymous SNV (2:179421694:A:G,r2=0.795545); TTN:nonsynonymous SNV (2:179427536:C:T,r2=0.77744); TTN:nonsynonymous SNV (2:179464527:C:T,r2=0.789679); TTN:nonsynonymous SNV (2:179558366:C:T,r2=0.694042)	TTN	PLEKHA3	PLEKHA3	FKBP7	TTN	PRKRA	TTN	3.21579	CCDC141	0.567343	PRKRA	0.243614			TTN	-
rs4673912	12	11	2:201168993:G:T	2	201168993	8.326e-09	G	T	0.3797	0.096	0.0167	SPATS2L	intergenic	1.354	NA	NA	NA	NA	0	NA	NA	SPATS2L	SPATS2L	SPATS2L	TYW5	MAIP1	SPATS2L	0.570477	KCTD18	0.054875	TYW5	-0.00372409			SPATS2L	-
rs4673662	13	12	2:213205375:A:G	2	213205375	4.683e-10	A	G	0.2843	-0.1156	0.0186	ERBB4	intronic	4.835	NA	NA	NA	NA	0	NA	NA	ERBB4	ERBB4	ERBB4	-	-	ERBB4	1.50184	-	-	-	-			ERBB4	-
rs4642101	14	13	3:12842223:G:T	3	12842223	3.725e-11	T	G	0.3141	0.1138	0.0172	CAND2	intronic	2.388	NA	NA	NA	NA	1	CAND2:nonsynonymous SNV (3:12848822:C:T,r2=0.934625); CAND2:nonsynonymous SNV (3:12858028:C:T,r2=0.721589); CAND2:nonsynonymous SNV (3:12859004:A:C,r2=0.669682)	CAND2	CAND2	CAND2	TSEN2	RAF1	CAND2	RAF1	0.991611	CAND2	0.46501	RPL32	0.269451			CAND2	-
rs17226476	15	13	3:14276982:A:G	3	14276982	6.072e-22	G	A	0.2406	0.1769	0.0184	LSM3	intergenic	6.567	NA	NA	NA	NA	0	NA	NA	LSM3	LSM3	LSM3	XPC	CHCHD4	WNT7A	0.725688	SLC6A6	0.420939	XPC	0.358191			CAND2	-
rs4687718	16	14	3:53282303:A:G	3	53282303	5.389e-16	A	G	0.1362	-0.1784	0.022	TKT	intronic	8.102	NA	NA	NA	NA	0	NA	NA	TKT	TKT	TKT	STIMATE-MUSTN1	PRKCD	TKT	1.02735	PRKCD	0.44713	SFMBT1	0.365459	ITIH4		TKT	-
rs140936008	17	15	3:107186701:G:T	3	107186701	8.095e-09	G	T	0.01292	0.3755	0.0651	RP11-115H18.1	intergenic	2.109	NA	NA	NA	NA	0	NA	NA	BBX	BBX	BBX	CCDC54	-	BBX	0.0187043	CCDC54	-0.0227392	-	-			BBX	-
rs1836688	18	16	3:158311547:A:G	3	158311547	1.856e-11	A	G	0.4811	0.1108	0.0165	MLF1	intronic	5.584	NA	NA	NA	NA	1	GFM1:nonsynonymous SNV (3:158366900:A:G,r2=0.898123); LXN:nonsynonymous SNV (3:158388780:C:T,r2=0.898123)	GFM1; LXN	MLF1	MLF1	MLF1	GFM1	LXN	MLF1	0.99463	RARRES1	0.627333	RSRC1	0.2615		MLF1; RARRES1	MLF1	-
rs2129982	19	17	4:111704143:A:G	4	111704143	5.569e-12	A	G	0.2445	0.1331	0.0193	RP11-777N19.1	intergenic	1.529	NA	NA	NA	NA	0	NA	NA	PITX2	PITX2	PITX2	ENPEP	-	PITX2	0.872261	ENPEP	-0.181213	-	-			PITX2	-
rs56087422	20	18	4:114444394:A:G	4	114444394	5.295e-10	A	G	0.2823	0.12	0.0193	CAMK2D	intronic	8.769	NA	NA	NA	NA	0	NA	NA	CAMK2D	CAMK2D	CAMK2D	ARSJ	-	CAMK2D	1.49096	ARSJ	-0.199798	-	-			CAMK2D	-
rs10487613	21	19	5:56976098:A:G	5	56976098	6.564e-10	A	G	0.2028	-0.1295	0.021	AC008780.1	intergenic	1.331	NA	NA	NA	NA	0	NA	NA	ACTBL2	ACTBL2	ACTBL2	-	-	MAP3K1	0.282314	GAPT	0.164892	PLK2	0.0300689			ACTBL2	-
rs11950646	22	20	5:138714474:A:G	5	138714474	4.037e-10	G	A	0.3787	0.1108	0.0177	SLC23A1	intronic	5.793	NA	NA	NA	NA	1	SLC23A1:stopgain (5:138720108:C:T,r2=0.816704); PROB1:nonsynonymous SNV (5:138730037:C:T,r2=0.659394); SPATA24:nonsynonymous SNV (5:138732579:C:T,r2=0.941207)	SLC23A1; PROB1; SPATA24	SLC23A1	SLC23A1	SPATA24	STING1	SLC23A1	SIL1	0.642385	UBE2D2	0.389379	TMEM173	0.383952	SPATA24; PROB1		SLC23A1	SPATA24
rs4713999	23	21	6:36633069:A:G	6	36633069	3.778e-21	A	G	0.331	0.1664	0.0176	Y_RNA	intergenic	0.62	NA	NA	NA	NA	0	NA	NA	CDKN1A	CDKN1A	CDKN1A	RAB44	ETV7	CPNE5	0.25612	CDKN1A	0.146158	STK38	0.0869529			CDKN1A	-
rs625899	24	22	6:53957588:C:T	6	53957588	1e-09	T	C	0.3131	-0.1101	0.018	MLIP	intronic	4.142	NA	NA	NA	NA	0	NA	NA	MLIP	MLIP	MLIP	TINAG	LRRC1	MLIP	1.67972	GCLC	0.274033	KLHL31	0.161493			MLIP	-
rs72962906	25	23	6:119008305:C:T	6	119008305	2.785e-09	C	T	0.3827	0.1032	0.0174	CEP85L	intronic	2.492	NA	NA	NA	NA	0	NA	NA	CEP85L	CEP85L	CEP85L	ASF1A	PLN	PLN	1.41281	CEP85L	0.196423	FAM184A	0.173869			PLN	CEP85L
rs17165191	26	24	7:128451004:C:T	7	128451004	9.816e-19	T	C	0.1421	-0.2118	0.024	CCDC136	intronic	3.865	NA	NA	NA	NA	0	NA	NA	FLNC	FLNC	CCDC136	FLNC	IRF5	FLNC	2.39579	OPN1SW	0.619335	HILPDA	0.436677	CCDC136		FLNC	-
rs7461129	27	25	8:125861374:C:T	8	125861374	4.671e-15	C	T	0.337	-0.142	0.0181	RP11-1082L8.3:LINC00964	ncRNA_intronic	4.178	NA	NA	NA	NA	0	NA	NA	MTSS1	MTSS1	MTSS1	SQLE	ZNF572	SQLE	0.224085	NDUFB9	0.17501	TRMT12	0.115834			MTSS1	-
rs10824026	28	26	10:75421208:A:G	10	75421208	5.843e-13	G	A	0.16	0.1644	0.0228	SYNPO2L:RP11-464F9.21	ncRNA_intronic	0.412	NA	NA	NA	NA	1	SYNPO2L:nonsynonymous SNV (10:75407290:A:G,r2=0.791627); SYNPO2L:nonsynonymous SNV (10:75415677:C:T,r2=0.834247); SYNPO2L:nonsynonymous SNV (10:75406912:G:T,r2=0.791627)	SYNPO2L	SYNPO2L	SYNPO2L	SYNPO2L	MYOZ1	NDST2	MYOZ1	0.665542	FUT11	0.650561	PLAU	0.519896	MRPS16		SYNPO2L	-
rs11186636	29	27	10:93394295:C:T	10	93394295	6.865e-09	T	C	0.0994	0.1569	0.0271	PPP1R3C	intergenic	0.686	NA	NA	NA	NA	0	NA	NA	PPP1R3C	PPP1R3C	HECTD2	FGFBP3	PPP1R3C	PPP1R3C	0.863634	FGFBP3	0.160407	TNKS2	0.0944392			PPP1R3C	-
rs72842207	30	28	10:121433675:C:T	10	121433675	7.719e-58	C	T	0.2177	-0.3581	0.0223	BAG3	intronic	2.043	NA	NA	NA	NA	1	BAG3:nonsynonymous SNV (10:121429633:C:T,r2=0.994263)	BAG3	BAG3	BAG3	BAG3	MCMBP	SEC23IP	BAG3	2.25119	RGS10	0.594032	MCMBP	0.444938			BAG3	-
rs11199105	31	28	10:121615484:C:T	10	121615484	2.696e-11	C	T	0.09543	0.1896	0.0285	MCMBP	intronic	6.972	NA	NA	NA	NA	0	NA	NA	MCMBP	MCMBP	BAG3	INPP5F	TIAL1	BAG3	2.25119	RGS10	0.594032	MCMBP	0.444938			BAG3	-
rs6490242	32	29	12:119610739:C:T	12	119610739	2.489e-09	C	T	0.2753	0.1162	0.0195	RP11-64B16.3	intergenic	2.252	NA	NA	NA	NA	0	NA	NA	HSPB8	HSPB8	HSPB8	CCDC60	SRRM4	HSPB8	1.25325	SRRM4	0.109508	CCDC60	0.0393687			HSPB8	-
rs62012629	33	30	15:79070351:A:C	15	79070351	3.431e-11	C	A	0.2803	-0.125	0.0189	ADAMTS7	intronic	0.126	NA	NA	NA	NA	1	ADAMTS7:nonsynonymous SNV (15:79054900:C:G,r2=0.710417); ADAMTS7:nonsynonymous SNV (15:79058013:C:T,r2=0.748095)	ADAMTS7	MORF4L1	MORF4L1	ADAMTS7	CHRNB4	MORF4L1	CTSH	0.477844	CRABP1	0.449974	CHRNB4	0.274776			ADAMTS7	-
rs4589552	34	31	16:767519:C:T	16	767519	2.317e-08	T	C	0.2018	0.1091	0.0195	METRN	UTR3	0.901	NA	NA	NA	NA	1	HAGHL:nonsynonymous SNV (16:778158:C:G,r2=0.746492); HAGHL:nonsynonymous SNV (16:778820:A:G,r2=0.755); NARFL:nonsynonymous SNV (16:784765:C:T,r2=0.754035)	HAGHL; NARFL	METRN	METRN	CIAO3	ANTKMT	PIGQ	LMF1	0.854842	SOX8	0.825059	STUB1	0.695131			LMF1	-
rs4470148	35	31	16:1002328:C:T	16	1002328	1.209e-08	T	C	0.01193	-0.1193	0.0209	LMF1	intronic	4.785	NA	NA	NA	NA	0	NA	NA	LMF1	LMF1	LMF1	SOX8	SSTR5	UBE2I	1.04201	LMF1	0.854842	SOX8	0.825059			LMF1	-
rs2729577	36	31	16:1009035:A:G	16	1009035	8.004e-13	A	G	0.3757	-0.1237	0.0173	LMF1	intronic	3.35	NA	NA	NA	NA	0	NA	NA	LMF1	LMF1	LMF1	SOX8	SSTR5	UBE2I	1.04201	LMF1	0.854842	SOX8	0.825059			LMF1	-
rs923862	37	32	17:2031382:A:C	17	2031382	1.079e-08	A	C	0.2763	0.102	0.0178	SMG6	intronic	4.425	NA	NA	NA	NA	1	SMG6:nonsynonymous SNV (17:2091765:C:T,r2=0.76253)	SMG6	HIC1	HIC1	SRR	DPH1	SGSM2	SRR	0.746413	SMG6	0.577638	SERPINF2	0.52322			SRR	-
rs9903921	38	33	17:64331601:C:T	17	64331601	3.98e-16	C	T	0.3419	-0.1403	0.0172	PRKCA	intronic	3.551	NA	NA	NA	NA	0	NA	NA	PRKCA	PRKCA	PRKCA	APOH	CEP112	PRKCA	2.34136	APOH	0.969696	CEP112	0.543255			PRKCA	-
rs499715	39	34	18:34243902:G:T	18	34243902	4.672e-11	T	G	0.2575	0.1405	0.0214	FHOD3	intronic	14.24	NA	NA	NA	NA	1	FHOD3:nonsynonymous SNV (18:34232610:C:T,r2=0.835807)	FHOD3	KIAA1328	KIAA1328	TPGS2	KIAA1328	FHOD3	FHOD3	1.22145	KIAA1328	-0.0774363	TPGS2	-0.124078			FHOD3	-
rs9964535	40	34	18:34261511:C:T	18	34261511	4.079e-08	C	T	0.008946	0.282	0.0514	FHOD3	exonic	27	exonic	FHOD3	nonsynonymous SNV	exon15	1	FHOD3:nonsynonymous SNV (18:34261511:C:T,r2=1)	FHOD3	KIAA1328	KIAA1328	FHOD3	TPGS2	KIAA1328	FHOD3	1.22145	KIAA1328	-0.0774363	TPGS2	-0.124078			FHOD3	-
rs11660748	41	35	18:55919898:A:G	18	55919898	1.532e-12	A	G	0.1064	-0.2201	0.0311	NEDD4L	intronic	1.345	NA	NA	NA	NA	0	NA	NA	NEDD4L	NEDD4L	NEDD4L	ALPK2	MALT1	NEDD4L	2.94633	ALPK2	0.263149	ATP8B1	0.0166085			NEDD4L	-
rs4941375	42	35	18:55944135:A:C	18	55944135	4.036e-11	A	C	0.1938	0.1391	0.0211	NEDD4L	intronic	0.205	NA	NA	NA	NA	0	NA	NA	NEDD4L	NEDD4L	NEDD4L	ALPK2	MALT1	NEDD4L	2.94633	ALPK2	0.263149	ATP8B1	0.0166085			NEDD4L	-
rs62222424	43	36	21:30530131:A:G	21	30530131	2.699e-12	G	A	0.06461	0.2722	0.0389	MAP3K7CL	intronic	2.523	NA	NA	NA	NA	0	NA	NA	BACH1	BACH1	CCT8	MAP3K7CL	LTN1	BACH1	0.81138	MAP3K7CL	0.806842	USP16	0.46372			BACH1	-
rs145621219	44	37	22:18609493:A:G	22	18609493	1.556e-10	G	A	0.005964	0.4316	0.0674	PEX26:TUBA8	exonic	29	exonic	TUBA8	nonsynonymous SNV	exon4	1	TUBA8:nonsynonymous SNV (22:18609493:A:G,r2=1)	TUBA8	TUBA8	TUBA8	TUBA8	PEX26	USP18	MICAL3	0.174174	TUBA8	0.161917	PEX26	0.0954809			TUBA8	-
rs2186370	45	38	22:24171305:A:G	22	24171305	4.642e-16	A	G	0.1889	0.1734	0.0214	SMARCB1	intronic	11.11	NA	NA	NA	NA	1	DERL3:nonsynonymous SNV (22:24179132:A:G,r2=0.653242)	DERL3	DERL3	DERL3	VPREB3	CHCHD10	SMARCB1	SMARCB1	2.1391	CHCHD10	1.30575	MMP11	0.719866		MMP11	SMARCB1	-
Note: OpenTargets was queried in October 2023. P-values and other GWAS test statistics are derived from inverse-variance-weighted meta-analysis of logistic regression models. P-values are two-sided and unadjusted for multiple testing. Abbreviations: GWAS, genome-wide association study; DCM, dilated cardiomyopathy; FUMA, Functional Mapping and Annotation; chr, chromosome; pos, position on chromoso…

## Sheet: ST7 GWAS-DCM loci merged MRI
Supplementary Table 7: GWAS-DCM loci and their effects on left ventricular traits from cardiac MRI
Locus #	FUMA nearest gene	Most highly prioritzed gene in locus	Pubmed ID if previously published	Locus in MTAG-DCM?	Lead SNP	Chromosome	Position (GRCh37)	GRCh37	EA	NEA	GWAS-DCM						MTAG-DCM			Circumferential Strain GWAS			LVESVi GWAS			LV Concentricity GWAS			LVEF GWAS			LVMi GWAS			LVEDVi GWAS			Longitudinal Strain GWAS			Radial Strain GWAS			Max WT GWAS			Mean WT GWAS
											EAF	β	SE	OR	95%CI	P	β	SE	P	β	SE	P	β	SE	P	β	SE	P	β	SE	P	β	SE	P	β	SE	P	β	SE	P	β	SE	P	β	SE	P	β	SE	P
1	C1orf86:AL590822.1:RP11-181G12.4	SKI		Yes	rs2503715	1	2144107	1:2144107	G	A	0.8286	-0.1425	0.0258	0.867188	0.82-0.91	3.48e-08	-0.14449	0.017931	7.75e-16	-0.2058	0.03582	5.3e-09	-0.43069	0.08518	2e-07	0.005212	0.000841	3.5e-10	0.289922	0.066316	1.3e-05	0.126566	0.071629	0.077	-0.48325	0.143552	0.00076	-0.09528	0.031724	0.0027	0.412153	0.089229	3.9e-06	0.051125	0.01369	0.00019	0.024268	0.005717	2.2e-05
2	HSPB7	HSPB7	33495596, 33677556	Yes	rs1763605	1	16338925	1:16338925	G	T	0.7008	0.234	0.0185	1.26364	1.22-1.31	8.61e-37	0.208894	0.01347	3.04e-54	0.206203	0.024227	1e-18	0.510226	0.05761	2.8e-19	-0.00212	0.000569	0.0001	-0.39063	0.044851	3e-18	0.140377	0.048445	0.0038	0.51837	0.097088	9.3e-08	0.120034	0.021442	2.2e-08	-0.42325	0.06035	2.3e-12	-0.02435	0.009256	0.0085	-0.00146	0.003867	0.71
3	TESK2	AKR1A1		Yes	rs12743512	1	45954033	1:45954033	A	G	0.4515	0.0968	0.0166	1.10164	1.07-1.14	5.23e-09	0.090117	0.012268	2.04e-13	0.068085	0.023056	0.0017	0.307022	0.05482	1.4e-08	-0.00198	0.000542	0.00017	-0.12568	0.042678	0.0035	0.148961	0.046099	0.0012	0.494556	0.092386	8.6e-08	0.008535	0.020415	0.68	-0.07178	0.057434	0.21	0.010573	0.00881	0.23	-0.00163	0.00368	0.66
4	HMGB1P45	DMRTA2		Yes	rs76166750	1	50840676	1:50840676	A	G	0.0363	0.2469	0.0443	1.28005	1.17-1.40	2.52e-08	0.163684	0.032819	6.12e-07	0.087902	0.060186	0.18	0.190228	0.143113	0.21	-0.0047	0.001414	0.0014	-0.00166	0.111423	0.86	-0.15992	0.120345	0.18	0.434566	0.241183	0.072	-0.03629	0.053307	0.5	-0.13694	0.149925	0.36	-0.05596	0.022993	0.015	-0.02158	0.009605	0.025
5	NFIA	TM2D1		No	rs2474370	1	61886891	1:61886891	T	C	0.7172	-0.1355	0.0191	0.873279	0.84-0.91	1.36e-12	-0.0667	0.01389	1.57e-06	0.025974	0.024655	0.36	-0.05094	0.058631	0.36	0.000615	0.000579	0.27	0.095422	0.045645	0.033	0.090994	0.049303	0.065	0.074948	0.098809	0.45	0.037431	0.021856	0.087	-0.16964	0.061416	0.0057	0.027577	0.009425	0.0034	0.003157	0.003935	0.42
6	ACTN2	ACTN2		Yes	rs4659701	1	236853167	1:236853167	A	G	0.6061	0.1414	0.0177	1.15189	1.11-1.19	1.64e-15	0.113103	0.01282	1.12e-18	0.12256	0.023676	8.3e-08	0.18375	0.05629	0.00092	0.000485	0.000556	0.3	-0.15462	0.043823	0.00051	0.116456	0.047335	0.014	0.126765	0.094864	0.18	0.060042	0.020995	0.0042	-0.12215	0.058979	0.038	0.011092	0.009049	0.22	0.014678	0.003779	0.0001
7	CRIM1	CRIM1		Yes	rs2049367	2	36668219	2:36668219	A	C	0.2993	0.1269	0.0178	1.1353	1.10-1.18	9.73e-13	0.093407	0.013233	1.68e-12	0.041295	0.025446	0.13	0.227409	0.060514	0.00015	-0.00137	0.000598	0.035	0.004629	0.047085	0.96	0.192722	0.050864	0.00015	0.523771	0.102017	2.8e-07	-0.00429	0.022534	0.85	-0.07238	0.063334	0.25	0.02043	0.009727	0.036	0.001863	0.004059	0.65
7	STRN	CRIM1		Yes	rs2540926	2	37090897	2:37090897	A	G	0.4338	0.1149	0.0176	1.12176	1.08-1.16	7.15e-11	0.0731	0.012728	9.28e-09	0.042223	0.023148	0.075	0.075942	0.055047	0.18	-0.00187	0.000544	0.0004	-0.06492	0.04283	0.13	-0.12177	0.046269	0.0085	0.09024	0.092801	0.33	-0.02778	0.020513	0.18	-0.15655	0.057613	0.0066	-0.0293	0.008845	0.00092	-0.01489	0.003692	5.5e-05
8	TMEM182	TMEM182		Yes	rs2540277	2	103426177	2:103426177	T	C	0.0585	0.1918	0.0345	1.21143	1.13-1.30	2.67e-08	0.206445	0.025803	1.24e-15	0.254565	0.046282	6e-08	0.570651	0.110044	2e-07	-0.00276	0.001087	0.017	-0.40891	0.08562	1.3e-06	0.089017	0.092495	0.34	0.579228	0.185516	0.0018	0.109853	0.040951	0.0073	-0.54243	0.115193	2.5e-06	-0.04058	0.017675	0.022	-0.0105	0.007379	0.15
9	TANC1	TANC1		Yes	rs525576	2	159973446	2:159973446	C	T	0.871	-0.1509	0.0268	0.859934	0.82-0.91	1.84e-08	-0.1327	0.019123	3.94e-12	-0.17227	0.047699	0.00029	-0.48296	0.113386	1.3e-05	0.000735	0.00112	0.55	0.367283	0.08822	1.8e-05	-0.24819	0.095304	0.0092	-0.49103	0.191151	0.01	-0.07157	0.0422	0.09	0.359458	0.118718	0.0025	0.000752	0.018229	0.97	-0.00922	0.007608	0.23
10	TTN-AS1:TTN	TTN	33495596	Yes	rs16866400	2	179448911	2:179448911	A	G	0.2068	-0.1507	0.0208	0.860106	0.83-0.90	4.74e-13	-0.19791	0.015231	1.33e-38	-0.25999	0.02883	8.9e-20	-0.79344	0.068563	8.9e-31	0.001068	0.000677	0.14	0.468067	0.053346	1.9e-18	-0.53175	0.05763	2.8e-20	-1.05285	0.115587	8.3e-20	-0.12219	0.025558	1.7e-06	0.518902	0.071756	4.8e-13	-0.02376	0.011013	0.031	-0.01839	0.004598	6.4e-05
11	SPATS2L	SPATS2L		Yes	rs4673912	2	201168993	2:201168993	T	G	0.4218	0.096	0.0167	1.10076	1.07-1.14	8.33e-09	0.076422	0.012375	6.59e-10	0.058833	0.023575	0.0057	0.173403	0.056065	0.002	-0.00172	0.000554	0.0028	-0.09984	0.043621	0.025	0.013171	0.047124	0.78	0.263959	0.094517	0.0052	0.008105	0.020892	0.7	-0.09516	0.058676	0.1	-0.01635	0.009009	0.07	-0.00884	0.00376	0.019
12	ERBB4	ERBB4		Yes	rs4673662	2	213205375	2:213205375	G	A	0.7027	-0.1156	0.0186	0.890831	0.86-0.92	4.68e-10	-0.09201	0.013563	1.17e-11	-0.06652	0.02513	0.0092	-0.22466	0.059746	0.00015	0.001604	0.00059	0.0053	0.109325	0.046485	0.025	-0.1074	0.050218	0.032	-0.363	0.100722	0.00031	-0.06891	0.022282	0.002	0.114332	0.062546	0.068	0.005251	0.009601	0.58	0.001885	0.004008	0.64
13	CAND2	CAND2	33495596, 33677556	Yes	rs4642101	3	12842223	3:12842223	G	T	0.623	0.1138	0.0172	1.12053	1.08-1.16	3.73e-11	0.087966	0.012687	4.1e-12	0.072515	0.024062	0.002	0.169789	0.057207	0.0021	-0.00119	0.000566	0.029	-0.16724	0.044531	0.00014	-0.04933	0.048132	0.31	0.086388	0.096441	0.37	0.025068	0.021333	0.24	-0.22178	0.059909	0.00021	-0.00787	0.009203	0.39	-0.00603	0.003844	0.12
13	LSM3	CAND2	33495596, 33677556	Yes	rs17226476	3	14276982	3:14276982	A	G	0.282	0.1769	0.0184	1.19351	1.15-1.24	6.07e-22	0.144093	0.013606	3.31e-26	0.128041	0.027999	2e-06	0.363833	0.06656	2.1e-08	-0.00199	0.000658	0.001	-0.24916	0.051814	7.5e-07	0.093063	0.056002	0.097	0.387215	0.112209	0.00056	0.023847	0.024842	0.34	-0.32477	0.069711	3.2e-06	-0.03394	0.010702	0.0015	0.001297	0.004473	0.77
14	TKT	TKT		Yes	rs4687718	3	53282303	3:53282303	G	A	0.8397	-0.1784	0.022	0.836608	0.80-0.87	5.39e-16	-0.12853	0.016471	6.04e-15	-0.13249	0.034309	0.00021	-0.11979	0.081565	0.14	-0.0024	0.000807	0.0027	0.187211	0.063491	0.0024	-0.09556	0.068626	0.16	0.094816	0.137503	0.49	-0.04405	0.030401	0.15	0.108867	0.085423	0.2	0.002838	0.013118	0.83	-0.02413	0.005481	1.1e-05
15	RP11-115H18.1	BBX		No	rs140936008	3	107186701	3:107186701	T	G	0.0205	0.3755	0.0651	1.45572	1.28-1.65	8.1e-09	NA	NA	NA	NA	NA	NA	NA	NA	NA	NA	NA	NA	NA	NA	NA	NA	NA	NA	NA	NA	NA	NA	NA	NA	NA	NA	NA	NA	NA	NA	NA	NA	NA
16	MLF 1.00	MLF1		Yes	rs1836688	3	158311547	3:158311547	G	A	0.4945	0.1108	0.0165	1.11717	1.08-1.15	1.86e-11	0.109406	0.01222	3.45e-19	0.122334	0.022913	2.9e-08	0.311569	0.054483	3.2e-09	-0.0003	0.000539	0.52	-0.16946	0.04241	5.4e-05	0.217937	0.04584	2e-06	0.451723	0.091849	8.7e-07	0.029661	0.020314	0.14	-0.13173	0.057049	0.021	0.022782	0.008758	0.0093	0.010397	0.00366	0.0045
17	RP11-777N19.1	PITX2		Yes	rs2129982	4	111704143	4:111704143	G	A	0.226	0.1331	0.0193	1.14236	1.10-1.19	5.57e-12	0.091767	0.014476	2.31e-10	0.066153	0.028892	0.026	0.101548	0.068737	0.11	-0.00087	0.000678	0.15	-0.05738	0.053442	0.22	0.033739	0.057792	0.56	0.155008	0.115741	0.18	0.00128	0.025542	0.96	-0.05819	0.071874	0.42	0.005698	0.011031	0.61	-0.00242	0.004612	0.6
18	CAMK2D	CAMK2D		No	rs56087422	4	114444394	4:114444394	G	A	0.2607	0.12	0.0193	1.1275	1.09-1.17	5.3e-10	0.061923	0.014094	1.12e-05	0.020053	0.026119	0.46	-0.03644	0.062137	0.58	-0.00154	0.000613	0.014	-0.00272	0.048309	1	-0.16348	0.052243	0.0018	-0.11853	0.104628	0.26	-0.02085	0.023099	0.37	-0.05812	0.064976	0.37	-0.01563	0.00997	0.12	-0.01685	0.004169	5.3e-05
19	AC008780.1	ACTBL2		Yes	rs10487613	5	56976098	5:56976098	G	A	0.7954	-0.1295	0.021	0.878535	0.84-0.92	6.56e-10	-0.12513	0.015394	4.35e-16	-0.1463	0.029216	1e-06	-0.34019	0.069506	1.6e-06	0.001774	0.000687	0.0096	0.153675	0.054049	0.0053	-0.13726	0.05846	0.019	-0.55062	0.117183	2.6e-06	-0.00634	0.025883	0.81	0.177655	0.072733	0.015	0.005874	0.011165	0.6	0.002536	0.004667	0.59
20	SLC23A1	SLC23A1		Yes	rs11950646	5	138714474	5:138714474	A	G	0.664	0.1108	0.0177	1.11717	1.08-1.16	4.04e-10	0.113722	0.013054	2.99e-18	0.147962	0.024299	2.8e-09	0.296557	0.057815	3.8e-07	-0.0008	0.000571	0.21	-0.29538	0.044956	9.3e-11	0.025084	0.048627	0.61	0.155267	0.097472	0.11	0.063391	0.021523	0.0032	-0.28084	0.060493	3.4e-06	-0.00482	0.009287	0.6	-0.00248	0.003882	0.52
21	Y_RNA	CDKN1A	33495596	Yes	rs4713999	6	36633069	6:36633069	G	A	0.6649	0.1664	0.0176	1.18104	1.14-1.22	3.78e-21	0.139307	0.013003	8.83e-27	0.167283	0.024248	1.2e-12	0.209857	0.057695	0.0002	-0.00438	0.000569	2.4e-14	-0.16272	0.044831	0.00014	-0.22454	0.048538	3.7e-06	0.196984	0.097186	0.043	0.044644	0.021429	0.037	-0.36711	0.060347	1.2e-09	-0.05277	0.009266	1.2e-08	-0.03054	0.003871	3e-15
22	MLIP	MLIP		Yes	rs625899	6	53957588	6:53957588	C	T	0.6976	-0.1101	0.018	0.895745	0.86-0.93	1e-09	-0.09085	0.0134	1.2e-11	-0.06132	0.025202	0.014	-0.24368	0.05997	3.3e-05	0.000909	0.000592	0.11	0.135406	0.046594	0.0033	-0.11099	0.050451	0.028	-0.28593	0.101017	0.0046	-0.0167	0.022288	0.45	0.047337	0.062722	0.45	0.001	0.00963	0.92	-0.00505	0.004024	0.21
23	CEP85L	PLN		Yes	rs72962906	6	119008305	6:119008305	T	C	0.4057	0.1032	0.0174	1.10871	1.07-1.15	2.79e-09	0.073571	0.012663	6.25e-09	0.01163	0.023374	0.7	0.222342	0.055625	9.5e-05	-0.00153	0.000549	0.0041	-0.04217	0.04322	0.38	0.173919	0.046796	0.0002	0.477945	0.093698	3.4e-07	-0.12839	0.020662	5.2e-10	0.139733	0.058174	0.016	-0.02983	0.008933	0.00084	0.011195	0.003732	0.0027
24	CCDC136	FLNC	33495596	Yes	rs17165191	7	128451004	7:128451004	C	T	0.1513	-0.2118	0.024	0.809127	0.77-0.85	9.82e-19	-0.19159	0.017384	3.02e-28	-0.20832	0.032994	1.3e-10	-0.49607	0.07845	1.4e-10	0.001319	0.000775	0.12	0.33993	0.060992	1.4e-08	-0.20191	0.065953	0.0022	-0.56671	0.132184	1.8e-05	-0.08234	0.029196	0.0048	0.413797	0.082117	4.7e-07	0.0019	0.012599	0.88	-0.00114	0.005265	0.83
25	RP11-1082L8.3:LINC00964	MTSS1	33495596	Yes	rs7461129	8	125861374	8:125861374	T	C	0.3045	-0.142	0.0181	0.867621	0.84-0.90	4.67e-15	-0.14948	0.013358	4.54e-29	-0.16853	0.024756	2.1e-11	-0.47279	0.058871	4.8e-16	0.002805	0.000582	5.4e-07	0.375916	0.045777	3.6e-16	-0.0626	0.049548	0.21	-0.4591	0.099279	3.8e-06	-0.01907	0.021913	0.38	0.275383	0.061613	7.8e-06	0.05611	0.009462	3e-09	0.009261	0.003953	0.019
26	SYNPO2L:RP11-464F9.21	SYNPO2L		Yes	rs10824026	10	75421208	10:75421208	A	G	0.8329	0.1644	0.0228	1.17869	1.13-1.23	5.84e-13	0.105567	0.016657	2.33e-10	0.091075	0.03177	0.0029	0.038557	0.075573	0.66	-0.00326	0.000747	9.1e-06	-0.02911	0.058774	0.69	-0.23258	0.06359	0.00025	-0.02776	0.127439	0.83	0.075862	0.028104	0.0069	-0.21324	0.079102	0.007	-0.06646	0.012144	4.4e-08	-0.02538	0.005074	5.7e-07
27	PPP1R3C	PPP1R3C		No	rs11186636	10	93394295	10:93394295	C	T	0.106	0.1569	0.0271	1.16988	1.11-1.23	6.87e-09	0.09953	0.019983	6.33e-07	0.035481	0.038038	0.37	0.135777	0.090518	0.15	-0.00073	0.000894	0.5	-0.08173	0.070394	0.2	0.019216	0.076165	0.8	0.13593	0.15264	0.37	0.021602	0.03371	0.52	-0.08418	0.094709	0.37	-0.01573	0.014541	0.28	-0.00374	0.006075	0.54
28	BAG3	BAG3	33495596, 33677556	Yes	rs72842207	10	121433675	10:121433675	T	C	0.2089	-0.3581	0.0223	0.699003	0.67-0.73	7.72e-58	-0.32415	0.015751	4.16e-94	-0.34186	0.027886	6.5e-35	-0.80793	0.066336	1.6e-34	0.003008	0.000655	5.5e-06	0.605382	0.051593	1.5e-31	-0.22958	0.055818	3.9e-05	-0.80174	0.111863	7.7e-13	-0.12755	0.024671	2.3e-07	0.567023	0.069432	3.2e-16	0.023605	0.010657	0.027	0.000525	0.004453	0.91
28	MCMBP	BAG3	33495596, 33677556	Yes	rs11199105	10	121615484	10:121615484	T	C	0.0963	0.1896	0.0285	1.20877	1.14-1.28	2.7e-11	0.153117	0.0209	2.37e-13	0.171779	0.039711	3.3e-05	0.244484	0.094471	0.011	0.000231	0.000933	0.82	-0.31848	0.073469	1.6e-05	0.032151	0.079492	0.69	0.041333	0.159306	0.8	0.044087	0.035167	0.21	-0.29867	0.098876	0.0025	-0.01325	0.015179	0.38	0.008833	0.006341	0.16
29	RP11-64B16.3	HSPB8		Yes	rs6490242	12	119610739	12:119610739	T	C	0.2406	0.1162	0.0195	1.12322	1.08-1.17	2.49e-09	0.102728	0.014343	7.94e-13	0.098275	0.025578	0.00011	0.239813	0.060851	7.8e-05	3.99e-05	0.000601	0.9	-0.20458	0.047318	1.1e-05	0.120293	0.051131	0.019	0.22982	0.102483	0.025	0.015704	0.022637	0.49	-0.23551	0.063672	0.00022	0.013229	0.009774	0.18	0.006311	0.004081	0.12
30	ADAMTS7	ADAMTS7		Yes	rs62012629	15	79070351	15:79070351	A	C	0.3246	-0.125	0.0189	0.882497	0.85-0.92	3.43e-11	-0.09529	0.013537	1.93e-12	-0.06988	0.025984	0.0051	-0.23226	0.061824	0.00013	0.002624	0.00061	7.6e-06	0.149672	0.048064	0.0019	-0.00255	0.052012	0.96	-0.31468	0.104199	0.0025	0.005137	0.022997	0.82	0.142368	0.06467	0.028	0.030531	0.009929	0.0021	0.009444	0.004148	0.023
31	METRN	LMF1	33677556	Yes	rs4589552	16	767519	16:767519	C	T	0.25	0.1091	0.0195	1.11527	1.07-1.16	2.32e-08	0.071685	0.014312	5.48e-07	0.028744	0.03046	0.41	0.141898	0.072428	0.051	-0.00135	0.000716	0.076	-0.03684	0.056315	0.63	0.094311	0.060946	0.12	0.272897	0.122075	0.025	0.02849	0.026966	0.29	0.051125	0.075797	0.5	-0.01731	0.011642	0.14	-0.00417	0.004864	0.39
31	LMF1	LMF1	33677556	Yes	rs4470148	16	1002328	16:1002328	C	T	0.3363	-0.1193	0.0209	0.887541	0.85-0.92	1.21e-08	-0.10346	0.014682	1.83e-12	-0.12112	0.027502	5.1e-06	-0.23414	0.065412	0.00029	0.001974	0.000646	0.0019	0.103792	0.050857	0.043	-0.09535	0.055042	0.083	-0.41417	0.11025	0.00017	0.013079	0.02432	0.59	0.243986	0.068437	0.00036	0.004605	0.010511	0.66	0.002819	0.004392	0.52
31	LMF1	LMF1	33677556	Yes	rs2729577	16	1009035	16:1009035	G	A	0.3614	-0.1237	0.0173	0.883645	0.85-0.91	8e-13	-0.11464	0.012778	2.93e-19	-0.13502	0.023583	2.8e-09	-0.2548	0.056085	3.6e-06	0.002575	0.000554	3.6e-06	0.102056	0.043606	0.017	-0.06365	0.047193	0.18	-0.45162	0.094529	1.8e-06	-0.0014	0.02086	0.95	0.247977	0.058684	2.4e-05	0.01111	0.009015	0.22	0.00775	0.003766	0.04
32	SMG6	SRR		No	rs923862	17	2031382	17:2031382	C	A	0.3053	0.102	0.0178	1.10738	1.07-1.15	1.08e-08	0.07202	0.013245	5.4e-08	0.049691	0.025384	0.069	0.101857	0.060409	0.1	-0.00172	0.000596	0.0056	-0.04759	0.046937	0.39	-0.06295	0.050781	0.22	0.124955	0.101795	0.22	-0.00698	0.022483	0.76	-0.13639	0.063173	0.031	0.003467	0.0097	0.72	-0.00703	0.00405	0.083
33	PRKCA	PRKCA	33495596	Yes	rs9903921	17	64331601	17:64331601	T	C	0.3698	-0.1403	0.0172	0.869097	0.84-0.90	3.98e-16	-0.11677	0.012778	6.35e-20	-0.09476	0.024189	7.2e-05	-0.2867	0.05758	5.9e-07	0.001282	0.000568	0.032	0.149811	0.044738	0.00074	-0.14888	0.048403	0.0021	-0.42279	0.097028	1.3e-05	-0.01235	0.021413	0.56	0.200379	0.060199	0.00087	0.026029	0.00924	0.0048	-0.00112	0.00386	0.77
34	FHOD3	FHOD3	33495596	Yes	rs499715	18	34243902	18:34243902	G	T	0.7747	0.1405	0.0214	1.15085	1.10-1.20	4.67e-11	0.12536	0.015224	1.81e-16	0.145357	0.026033	1.1e-08	0.241314	0.061954	6.2e-05	-0.00118	0.000612	0.037	-0.23075	0.048153	1.5e-06	-0.00615	0.052102	0.91	0.149858	0.104407	0.15	0.09908	0.023033	1.7e-05	-0.33099	0.06479	3.2e-07	-0.0363	0.00995	0.00026	-0.00296	0.004157	0.48
34	FHOD3	FHOD3	33495596	Yes	rs9964535	18	34261511	18:34261511	T	C	0.0353	0.282	0.0514	1.32578	1.20-1.47	4.08e-08	NA	NA	NA	NA	NA	NA	NA	NA	NA	NA	NA	NA	NA	NA	NA	NA	NA	NA	NA	NA	NA	NA	NA	NA	NA	NA	NA	NA	NA	NA	NA	NA	NA
35	NEDD4L	NEDD4L		Yes	rs11660748	18	55919898	18:55919898	G	A	0.097	-0.2201	0.0311	0.802439	0.75-0.85	1.53e-12	-0.18018	0.021982	2.48e-16	-0.15427	0.0379	2.1e-05	-0.4084	0.09017	6.2e-06	0.001362	0.00089	0.13	0.22267	0.070083	0.001	-0.17481	0.075831	0.021	-0.49249	0.151958	0.0012	-0.07778	0.033484	0.02	0.273579	0.094327	0.0037	0.002047	0.014473	0.89	-0.00105	0.00605	0.86
35	NEDD4L	NEDD4L		Yes	rs4941375	18	55944135	18:55944135	C	A	0.1841	0.1391	0.0211	1.14924	1.10-1.20	4.04e-11	0.127654	0.015715	4.55e-16	0.118536	0.028425	2.8e-05	0.334439	0.06763	6.2e-07	-0.00081	0.000668	0.22	-0.16876	0.052565	0.00088	0.197311	0.056875	0.00052	0.453581	0.113973	6.9e-05	0.029046	0.025142	0.25	-0.09446	0.070745	0.18	0.012335	0.010859	0.26	0.006691	0.004539	0.14
36	MAP3K7CL	BACH1		Yes	rs62222424	21	30530131	21:30530131	A	G	0.0553	0.2722	0.0389	1.31285	1.22-1.42	2.7e-12	0.208916	0.027831	6.06e-14	0.154744	0.048896	0.001	0.441746	0.116389	0.00014	-0.00175	0.001149	0.11	-0.19865	0.090408	0.028	0.201555	0.097909	0.04	0.701839	0.196158	0.00035	-0.00894	0.043188	0.84	-0.10237	0.121664	0.4	0.005854	0.018685	0.75	0.007473	0.007809	0.34
37	PEX26:TUBA8	TUBA8		No	rs145621219	22	18609493	22:18609493	A	G	0.0243	0.4316	0.0674	1.53972	1.35-1.76	1.56e-10	NA	NA	NA	NA	NA	NA	NA	NA	NA	NA	NA	NA	NA	NA	NA	NA	NA	NA	NA	NA	NA	NA	NA	NA	NA	NA	NA	NA	NA	NA	NA	NA	NA
38	SMARCB1	SMARCB1	33495596, 33677556	Yes	rs2186370	22	24171305	22:24171305	G	A	0.8024	0.1734	0.0214	1.18934	1.14-1.24	4.64e-16	0.179461	0.015653	1.98e-30	0.210862	0.02881	4.3e-13	0.52962	0.068539	7.6e-15	-0.00606	0.000677	8.4e-19	-0.32372	0.053248	1.2e-09	-0.11512	0.057676	0.046	0.662912	0.115529	9.6e-09	0.02881	0.025468	0.26	-0.44915	0.07167	3.7e-10	-0.06957	0.011004	2.6e-10	-0.03241	0.004599	1.8e-12
Note: P-values and other GWAS test statistics are derived from inverse-variance-weighted meta-analysis of logistic regression models. P-values are two-sided and unadjusted for multiple testing. Abbreviations: MTAG, multi-trait analysis of GWAS; GWAS, genome-wide association study; DCM, dilated cardiomyopathy; FUMA, Functional Mapping and Annotation; EA, effect allele; NEA, non-effect allele; EAF,…

## Sheet: ST8 GWAS-DCM novelty loci LV HF
Supplementary Table 8: Look-up of GWAS-DCM loci for genome-wide significance in published LV and HF GWAS
Locus #	FUMA nearest gene	Most highly prioritzed gene in locus	Lead SNP	Chromosome	Position (GRCh37)	GRCh37	EA	NEA	GWAS-DCM BETA	GWAS-DCM P-value	Overlapping previous DCM locus? (see methods)	Overlapping LVEF locus? PMID 32382064	Overlapping LVESVi locus? PMID 32382064	Overlapping LVEDVi locus? PMID 32382064	Overlapping SVi locus? PMID 32382064	Overlapping published HF locus*? PMID 36376295	Overlapping published HF (MTAG) locus*? PMID 36376295	Reported in any?
1	C1orf86:AL590822.1:RP11-181G12.4	SKI	rs2503715	1	2144107	1:2144107	G	A	-0.1425	3.48e-08	0	1	0	0	0	0	0	1
2	HSPB7	HSPB7	rs1763605	1	16338925	1:16338925	G	T	0.234	8.61e-37	1	1	1	1	0	1	1	1
3	TESK2	AKR1A1	rs12743512	1	45954033	1:45954033	A	G	0.0968	5.23e-09	0	0	1	0	0	0	1	1
4	HMGB1P45	DMRTA2	rs76166750	1	50840676	1:50840676	A	G	0.2469	2.52e-08	0	0	0	0	0	1	0	1
5	NFIA	TM2D1	rs2474370	1	61886891	1:61886891	T	C	-0.1355	1.36e-12	0	0	0	0	0	1	0	1
6	ACTN2	ACTN2	rs4659701	1	236853167	1:236853167	A	G	0.1414	1.64e-15	0	1	0	0	0	0	1	1
7	CRIM1	CRIM1	rs2049367	2	36668219	2:36668219	A	C	0.1269	9.73e-13	0	0	0	0	0	1	1	1
7	STRN	CRIM1	rs2540926	2	37090897	2:37090897	A	G	0.1149	7.15e-11	0	0	0	0	0	1	1	1
8	TMEM182	TMEM182	rs2540277	2	103426177	2:103426177	T	C	0.1918	2.67e-08	0	0	0	0	0	0	0	0
9	TANC1	TANC1	rs525576	2	159973446	2:159973446	C	T	-0.1509	1.84e-08	0	0	0	0	0	0	0	0
10	TTN-AS1:TTN	TTN	rs16866400	2	179448911	2:179448911	A	G	-0.1507	4.74e-13	1	1	1	1	1	0	1	1
11	SPATS2L	SPATS2L	rs4673912	2	201168993	2:201168993	T	G	0.096	8.33e-09	0	0	1	1	0	0	1	1
12	ERBB4	ERBB4	rs4673662	2	213205375	2:213205375	G	A	-0.1156	4.68e-10	0	0	0	0	0	0	0	0
13	CAND2	CAND2	rs4642101	3	12842223	3:12842223	G	T	0.1138	3.73e-11	1	0	0	0	0	0	1	1
13	LSM3	CAND2	rs17226476	3	14276982	3:14276982	A	G	0.1769	6.07e-22	1	1	1	1	0	0	1	1
14	TKT	TKT	rs4687718	3	53282303	3:53282303	G	A	-0.1784	5.39e-16	0	0	0	0	0	0	0	0
15	RP11-115H18.1	BBX	rs140936008	3	107186701	3:107186701	T	G	0.3755	8.1e-09	0	0	0	0	0	0	0	0
16	MLF 1.00	MLF1	rs1836688	3	158311547	3:158311547	G	A	0.1108	1.86e-11	0	0	1	0	0	0	1	1
17	RP11-777N19.1	PITX2	rs2129982	4	111704143	4:111704143	G	A	0.1331	5.57e-12	0	0	0	0	0	1	1	1
18	CAMK2D	CAMK2D	rs56087422	4	114444394	4:114444394	G	A	0.12	5.3e-10	0	0	0	0	0	0	0	0
19	AC008780.1	ACTBL2	rs10487613	5	56976098	5:56976098	G	A	-0.1295	6.56e-10	0	0	0	0	0	0	0	0
20	SLC23A1	SLC23A1	rs11950646	5	138714474	5:138714474	A	G	0.1108	4.04e-10	0	1	1	0	0	1	1	1
21	Y_RNA	CDKN1A	rs4713999	6	36633069	6:36633069	G	A	0.1664	3.78e-21	1	1	1	0	0	1	1	1
22	MLIP	MLIP	rs625899	6	53957588	6:53957588	C	T	-0.1101	1e-09	0	0	0	0	0	0	1	1
23	CEP85L	PLN	rs72962906	6	119008305	6:119008305	T	C	0.1032	2.79e-09	0	0	0	1	1	0	1	1
24	CCDC136	FLNC	rs17165191	7	128451004	7:128451004	C	T	-0.2118	9.82e-19	1	1	1	0	0	0	1	1
25	RP11-1082L8.3:LINC00964	MTSS1	rs7461129	8	125861374	8:125861374	T	C	-0.142	4.67e-15	1	0	1	1	0	0	1	1
26	SYNPO2L:RP11-464F9.21	SYNPO2L	rs10824026	10	75421208	10:75421208	A	G	0.1644	5.84e-13	0	0	0	0	0	1	1	1
27	PPP1R3C	PPP1R3C	rs11186636	10	93394295	10:93394295	C	T	0.1569	6.87e-09	0	0	0	0	0	0	0	0
28	BAG3	BAG3	rs72842207	10	121433675	10:121433675	T	C	-0.3581	7.72e-58	1	1	1	1	0	1	1	1
28	MCMBP	BAG3	rs11199105	10	121615484	10:121615484	T	C	0.1896	2.7e-11	1	1	1	1	0	1	1	1
29	RP11-64B16.3	HSPB8	rs6490242	12	119610739	12:119610739	T	C	0.1162	2.49e-09	0	0	0	0	0	0	0	0
30	ADAMTS7	ADAMTS7	rs62012629	15	79070351	15:79070351	A	C	-0.125	3.43e-11	0	0	0	0	0	0	0	0
31	METRN	LMF1	rs4589552	16	767519	16:767519	C	T	0.1091	2.32e-08	1	1	1	0	0	0	1	1
31	LMF1	LMF1	rs4470148	16	1002328	16:1002328	C	T	-0.1193	1.21e-08	1	1	1	0	0	0	1	1
31	LMF1	LMF1	rs2729577	16	1009035	16:1009035	G	A	-0.1237	8e-13	1	1	1	0	0	0	1	1
32	SMG6	SRR	rs923862	17	2031382	17:2031382	C	A	0.102	1.08e-08	0	0	1	1	0	1	1	1
33	PRKCA	PRKCA	rs9903921	17	64331601	17:64331601	T	C	-0.1403	3.98e-16	1	0	1	0	0	0	1	1
34	FHOD3	FHOD3	rs499715	18	34243902	18:34243902	G	T	0.1405	4.67e-11	1	1	0	0	0	0	0	1
34	FHOD3	FHOD3	rs9964535	18	34261511	18:34261511	T	C	0.282	4.08e-08	1	1	0	0	0	0	0	1
35	NEDD4L	NEDD4L	rs11660748	18	55919898	18:55919898	G	A	-0.2201	1.53e-12	0	1	1	0	0	1	1	1
35	NEDD4L	NEDD4L	rs4941375	18	55944135	18:55944135	C	A	0.1391	4.04e-11	0	1	1	0	0	1	1	1
36	MAP3K7CL	BACH1	rs62222424	21	30530131	21:30530131	A	G	0.2722	2.7e-12	0	0	0	0	0	0	0	0
37	PEX26:TUBA8	TUBA8	rs145621219	22	18609493	22:18609493	A	G	0.4316	1.56e-10	0	0	0	0	0	0	0	0
38	SMARCB1	SMARCB1	rs2186370	22	24171305	22:24171305	G	A	0.1734	4.64e-16	1	1	1	0	0	1	1	1
Note: Look-up was performed searching for genome-wide significant results (P<5e-8). Results were filtered to P<2e-5. Summary statistics from LV GWAS were queried 1Mb down and upstream from the DCM-GWAS index variants. * For the HF GWAS, summary statistics have not been made publically available; there lead variants from GWAS-DCM residing within 2Mb from a lead variant from the HF GWAS were consid…

## Sheet: ST9 MTAG rg
Supplementary Table 9: Correlation matrix showing genetic correlations between GWAS-DCM, NICM, and left ventricular MRI traits jointly estimated using MTAG
	DCM	NICM	HCM	Ecc	Ell	Err	LVEF	LVEDVi	LVESVi	LVMi	LVconc
DCM	1	0.941	-0.605	0.747	0.338	-0.617	-0.709	0.494	0.7	0.222	-0.379
NICM	0.941	1	-0.485	0.615	0.27	-0.45	-0.508	0.47	0.578	0.188	-0.387
HCM	-0.605	-0.485	1	-0.52	-0.206	0.521	0.403	-0.294	-0.407	0.246	0.61
Ecc	0.747	0.615	-0.52	1	0.625	-0.824	-0.893	0.418	0.737	0.12	-0.347
Ell	0.338	0.27	-0.206	0.625	1	-0.605	-0.579	0.109	0.361	0.139	0.035
Err	-0.617	-0.45	0.521	-0.824	-0.605	1	0.815	-0.288	-0.619	0.035	0.338
LVEF	-0.709	-0.508	0.403	-0.893	-0.579	0.815	1	-0.421	-0.769	-0.228	0.247
LVEDVi	0.494	0.47	-0.294	0.418	0.109	-0.288	-0.421	1	0.842	0.583	-0.498
LVESVi	0.7	0.578	-0.407	0.737	0.361	-0.619	-0.769	0.842	1	0.498	-0.457
LVMi	0.222	0.188	0.246	0.124	0.139	0.035	-0.228	0.583	0.498	1	0.316
LVconc	-0.379	-0.387	0.61	-0.347	0.035	0.338	0.247	-0.498	-0.457	0.316	1
Note: MRI, magnetic resonance imaging; GWAS, genome-wide association study; MTAG, multi-trait analysis for GWAS; DCM, dilated cardiomyopathy; NICM, nonischemic cardiomyopathy from biobank analysis; HCM, hypertrophic cardiomyopathy; Ecc, global circumferential strain; Ell, global longitudinal strain; Err, global radial strain; LVEF, left ventricular ejection fraction; LVEDVi, left ventricular end-…

## Sheet: ST10 MTAG-DCM lociannot
Supplementary Table 10: Genome-wide significant loci from MTAG-DCM with annotations and gene prioritization
LeadSNP	Variant #	Locus #	LeadSNP variant ID (chr:pos:ref:alt)	chr	pos (GRCh37)	P-value	NEA	EA	MAF	BETA	SE	Nearest_Gene (FUMA)	Function	CADD	Protein-altering							OpenTargets V2F					PoPS						eQTL/pQTL MR+coloc		Prioritized gene in locus	Tied gene (equal prio score)
															Annotation	Gene	exonic function	exon	LD with protein-altering	protein-altering summary	protein-altering gene	Closest gene	Closest coding gene	V2F #1	V2F #2	V2F #3	PoPS #1	PoPS #1 score	PoPS #2	PoPS #2 score	PoPS #3	PoPS #3 score	MODERATE coloc	STRONG coloc
rs2503715	1	1	1:2144107:A:G	1	2144107	7.75346e-16	A	G	0.1769	-0.144486	0.0179307	C1orf86:AL590822.1:RP11-181G12.4	ncRNA_intronic	20.3	NA	NA	NA	NA	0	NA	NA	FAAP20	FAAP20	FAAP20	RER1	MORN1	SKI	1.18086	PRKCZ	0.76208	GNB1	0.505428			SKI	FAAP20
rs11121483	2	2	1:6263792:A:G	1	6263792	2.77375e-10	A	G	0.3936	0.0841931	0.0133408	RPL22	intronic	1.864	NA	NA	NA	NA	0	NA	NA	RNF207	RNF207	RNF207	ICMT	RPL22	RNF207	0.556576	ACOT7	0.51526	KCNAB2	0.428724			RNF207	-
rs1763605	3	3	1:16338925:G:T	1	16338925	3.03523e-54	T	G	0.3221	0.208894	0.0134696	HSPB7	intergenic	6.454	NA	NA	NA	NA	1	NA	NA	CLCNKA	CLCNKA	CLCNKA	HSPB7	CLCNKB	EPHA2	1.16343	HSPB7	0.936831	FBLIM1	0.908672			HSPB7	CLCNKA; EPHA2
rs10927893	4	3	1:16359052:A:G	1	16359052	3.06662e-10	A	G	0.2316	0.138091	0.0219353	CLCNKA	intronic	3.907	NA	NA	NA	NA	0	NA	NA	CLCNKB	CLCNKB	HSPB7	FAM131C	CLCNKA	EPHA2	1.16343	HSPB7	0.936831	FBLIM1	0.908672			HSPB7	CLCNKA; EPHA2
rs518365	5	4	1:46010652:A:G	1	46010652	1.35681e-13	A	G	0.4801	0.0908406	0.0122749	AKR1A1	intergenic	4.709	NA	NA	NA	NA	0	NA	NA	PRDX1	PRDX1	MUTYH	AKR1A1	PRDX1	MAST2	0.87431	NASP	0.249963	ZSWIM5	0.204924	MAST2	AKR1A1	MAST2	-
rs72694111	6	5	1:51793258:C:T	1	51793258	2.47781e-08	T	C	0.02286	0.215739	0.0386987	TTC39A	intronic	9.434	NA	NA	NA	NA	0	NA	NA	TTC39A	TTC39A	EPS15	TXNDC12	TTC39A	CDKN2C	0.917891	FAF1	0.539545	EPS15	0.398799			CDKN2C	TTC39A
rs17699790	7	6	1:212107306:C:T	1	212107306	3.51683e-08	C	T	0.4264	0.0681042	0.0123522	RP11-565J7.1	intergenic	0.045	NA	NA	NA	NA	0	NA	NA	DTL	DTL	DTL	INTS7	LPGAT1	DTL	0.589614	LPGAT1	0.36526	NENF	0.156787			DTL	-
rs74139612	8	7	1:214285155:C:T	1	214285155	2.22384e-08	T	C	0.05368	-0.173722	0.0310572	PROX1	intergenic	3.968	NA	NA	NA	NA	0	NA	NA	PROX1	PROX1	SMYD2	PROX1	PTPN14	PROX1	1.26383	PTPN14	0.110614	CENPF	-0.104142			PROX1	-
rs429335	9	8	1:228520382:A:G	1	228520382	1.7385e-11	G	A	0.4205	-0.0847031	0.0125925	OBSCN	intronic	2.515	NA	NA	NA	NA	1	OBSCN:nonsynonymous SNV (1:228520973:C:G,r2=1); OBSCN:nonsynonymous SNV (1:228494790:A:G,r2=0.756683); OBSCN:nonsynonymous SNV (1:228504670:C:T,r2=0.765448); OBSCN:nonsynonymous SNV (1:228528563:C:G,r2=0.666075)	OBSCN	TRIM11	TRIM11	OBSCN	RNF187	IBA57	OBSCN	1.90632	HIST3H3	1.29729	RNF187	0.277291			OBSCN	-
rs4659701	10	9	1:236853167:A:G	1	236853167	1.12184e-18	G	A	0.3757	0.113103	0.0128203	ACTN2	intronic	11.43	NA	NA	NA	NA	0	NA	NA	ACTN2	ACTN2	ACTN2	LGALS8	HEATR1	ACTN2	3.35023	RYR2	1.32746	LGALS8	0.353716			ACTN2	-
rs3770895	11	10	2:36656471:A:G	2	36656471	9.85414e-13	G	A	0.2962	0.0943593	0.0132294	CRIM1	intronic	0.335	NA	NA	NA	NA	0	NA	NA	CRIM1	CRIM1	CRIM1	FEZ2	VIT	CRIM1	1.21418	FEZ2	0.290612	VIT	-0.233114		CRIM1	CRIM1	-
rs10193295	12	10	2:37169049:A:G	2	37169049	3.91687e-11	G	A	0.4781	-0.0807671	0.0122241	STRN	intronic	4.087	NA	NA	NA	NA	1	NA	NA	STRN	STRN	STRN	CEBPZ	VIT	EIF2AK2	0.504381	STRN	0.428754	PRKD3	0.31656			CRIM1	-
rs3771371	13	11	2:71627539:C:T	2	71627539	7.24475e-10	C	T	0.4473	-0.0757457	0.0122951	ZNF638	intronic	2.867	NA	NA	NA	NA	0	NA	NA	DYSF	DYSF	ZNF638	DYSF	MCEE	DYSF	0.487396	ZNF638	0.452649	PAIP2B	0.226046		ZNF638	DYSF	-
rs2540277	14	12	2:103426177:C:T	2	103426177	1.2356e-15	C	T	0.04871	0.206445	0.0258028	TMEM182	intronic	0.771	NA	NA	NA	NA	0	NA	NA	TMEM182	TMEM182	MFSD9	TMEM182	IL1RL1	SLC9A2	0.336516	IL18R1	0.244005	MFSD9	0.198064		TMEM182	TMEM182	-
rs10211560	15	13	2:159980395:C:T	2	159980395	3.19929e-12	T	C	0.1004	-0.133663	0.0191806	TANC1	intronic	4.182	NA	NA	NA	NA	0	NA	NA	TANC1	TANC1	TANC1	CD302	WDSUB1	TANC1	0.941688	BAZ2B	0.318068	DAPL1	0.235533			TANC1	-
rs72953347	16	14	2:179274829:A:G	2	179274829	9.10037e-09	G	A	0.2694	-0.0793691	0.0138112	AC009948.5	intergenic	7.145	NA	NA	NA	NA	0	NA	NA	PJVK	PJVK	FKBP7	PLEKHA3	RBM45	TTN	3.46047	OSBPL6	0.839418	PRKRA	0.362832			TTN	-
rs111882666	17	14	2:179362572:C:T	2	179362572	5.73519e-09	C	T	0.08847	0.120543	0.0206966	PLEKHA3	intronic	5.338	NA	NA	NA	NA	1	TTN:nonsynonymous SNV (2:179498042:C:T,r2=0.794924)	TTN	PLEKHA3	PLEKHA3	PLEKHA3	FKBP7	PJVK	TTN	3.46047	OSBPL6	0.839418	PRKRA	0.362832			TTN	-
rs12988307	18	14	2:179490478:C:T	2	179490478	9.03753e-39	T	C	0.2157	-0.201587	0.0154791	TTN-AS1:TTN	ncRNA_intronic	1.161	NA	NA	NA	NA	1	TTN:nonsynonymous SNV (2:179558366:C:T,r2=0.719369); TTN:nonsynonymous SNV (2:179444939:C:T,r2=0.797374); TTN:nonsynonymous SNV (2:179421694:A:G,r2=0.779758); TTN:nonsynonymous SNV (2:179427536:C:T,r2=0.76187); TTN:nonsynonymous SNV (2:179430997:A:G,r2=0.735642); TTN:nonsynonymous SNV (2:179451420:A:G,r2=0.796419); TTN:nonsynonymous SNV (2:179464527:C:T,r2=0.773936)	TTN	PLEKHA3	PLEKHA3	FKBP7	TTN	PRKRA	TTN	3.46047	CCDC141	1.68636	OSBPL6	0.839418			TTN	-
rs10167882	19	14	2:179776290:G:T	2	179776290	4.78641e-08	G	T	0.4036	0.0694232	0.012717	CCDC141	intronic	1.156	NA	NA	NA	NA	0	NA	NA	TTN	TTN	SESTD1	CCDC141	TTN	TTN	3.46047	CCDC141	1.68636	PRKRA	0.362832			TTN	-
rs7605146	20	15	2:201183888:A:G	2	201183888	1.48766e-10	G	A	0.3777	0.0792766	0.0123741	SPATS2L	intronic	0.028	NA	NA	NA	NA	0	NA	NA	SPATS2L	SPATS2L	SPATS2L	TYW5	FTCDNL1	SPATS2L	0.372426	KCTD18	-0.00344931	TYW5	-0.0245071			SPATS2L	-
rs4673661	21	16	2:213205047:A:G	2	213205047	8.78994e-12	A	G	0.2734	-0.0930665	0.013636	ERBB4	intronic	0.116	NA	NA	NA	NA	0	NA	NA	ERBB4	ERBB4	ERBB4	-	-	ERBB4	2.40405	IKZF2	0.234737	SPAG16	-0.440494			ERBB4	-
rs9834310	22	17	3:12709606:C:T	3	12709606	5.7581e-09	T	C	0.334	0.0798007	0.0137029	RAF1	intergenic	3.573	NA	NA	NA	NA	0	NA	NA	RAF1	RAF1	MKRN2	RAF1	TSEN2	PPARG	2.02838	RAF1	1.76204	CAND2	0.695236			CAND2	RAF1
rs4642101	23	17	3:12842223:G:T	3	12842223	4.10302e-12	T	G	0.3141	0.0879656	0.0126869	CAND2	intronic	2.388	NA	NA	NA	NA	1	CAND2:nonsynonymous SNV (3:12848822:C:T,r2=0.934625); CAND2:nonsynonymous SNV (3:12858028:C:T,r2=0.721589); CAND2:nonsynonymous SNV (3:12859004:A:C,r2=0.669682)	CAND2	CAND2	CAND2	TSEN2	RAF1	CAND2	PPARG	2.02838	RAF1	1.76204	CAND2	0.695236			CAND2	RAF1
rs6807275	24	17	3:14274451:A:G	3	14274451	1.65823e-30	G	A	0.2972	-0.160444	0.0139757	LSM3	intergenic	9.664	NA	NA	NA	NA	0	NA	NA	LSM3	LSM3	LSM3	XPC	CHCHD4	WNT7A	0.266125	TMEM43	0.208106	XPC	0.207858			CAND2	RAF1
rs34234056	25	17	3:14418444:A:G	3	14418444	2.37418e-12	A	G	0.4732	-0.0884194	0.0126124	RNA5SP124	intergenic	2.587	NA	NA	NA	NA	0	NA	NA	SLC6A6	SLC6A6	SLC6A6	GRIP2	LSM3	WNT7A	0.266125	TMEM43	0.208106	XPC	0.207858			CAND2	RAF1
rs1520005	26	17	3:14628058:A:G	3	14628058	3.57054e-08	G	A	0.4761	0.0711261	0.0129065	RHBDF1P1	intergenic	3.336	NA	NA	NA	NA	0	NA	NA	GRIP2	GRIP2	GRIP2	CCDC174	C3orf20	COLQ	0.525994	WNT7A	0.266125	SH3BP5	0.248926			CAND2	RAF1
rs13326165	27	18	3:52532118:A:G	3	52532118	1.83044e-08	A	G	0.1918	-0.0869146	0.0154452	STAB1	intronic	5.775	NA	NA	NA	NA	0	NA	NA	STAB1	STAB1	SEMA3G	ITIH4	STAB1	TNNC1	0.540952	TWF2	0.464918	BAP1	0.372175	ITIH4		TKT	-
rs36033494	28	18	3:53116851:C:T	3	53116851	2.04674e-10	C	T	0.4374	-0.0792268	0.0124614	RP11-894J14.5	intronic	1.3	NA	NA	NA	NA	0	NA	NA	SFMBT1	SFMBT1	RFT1	ITIH4	STIMATE	TNNC1	0.540952	TWF2	0.464918	BAP1	0.372175	ITIH4		TKT	-
rs62256002	29	18	3:53282990:C:T	3	53282990	5.96032e-15	T	C	0.1312	0.131364	0.0168312	TKT	intronic	2.256	NA	NA	NA	NA	0	NA	NA	TKT	TKT	TKT	RFT1	CACNA1D	PRKCD	1.0863	TKT	0.744769	TMEM110	0.367319			TKT	-
rs6802804	30	19	3:69862105:A:C	3	69862105	1.1678e-11	A	C	0.2167	-0.107954	0.0159126	MITF	intronic	3.014	NA	NA	NA	NA	0	NA	NA	MITF	MITF	MITF	FRMD4B	MDFIC2	MITF	2.41958	FRMD4B	0.206383	-	-			MITF	-
rs1836688	31	20	3:158311547:A:G	3	158311547	3.45414e-19	A	G	0.4811	0.109406	0.0122198	MLF1	intronic	5.584	NA	NA	NA	NA	1	LXN:nonsynonymous SNV (3:158388780:C:T,r2=0.898123); GFM1:nonsynonymous SNV (3:158366900:A:G,r2=0.898123)	LXN; GFM1	MLF1	MLF1	MLF1	GFM1	LXN	MLF1	1.32925	RARRES1	1.24324	SHOX2	0.745814		MLF1	MLF1	-
rs7618021	32	21	3:186083611:C:T	3	186083611	1.17336e-08	C	T	0.337	-0.0754048	0.0132207	DGKG	intergenic	10.84	NA	NA	NA	NA	0	NA	NA	DGKG	DGKG	DGKG	TBCCD1	DNAJB11	KNG1	0.288136	AHSG	0.0140536	DGKG	-0.0134719			DGKG	-
rs1400771	33	22	4:16034634:A:G	4	16034634	2.82283e-16	G	A	0.2326	0.112632	0.0137681	PROM1	intronic	1.368	NA	NA	NA	NA	0	NA	NA	PROM1	PROM1	PROM1	TAPT1	FGFBP2	PROM1	1.87087	TAPT1	0.0436656	CD38	0.0319358			PROM1	-
rs7683990	34	23	4:95453350:A:C	4	95453350	1.09673e-08	A	C	0.2087	0.0879348	0.0153865	PDLIM5	intronic	8.117	NA	NA	NA	NA	0	NA	NA	PDLIM5	PDLIM5	PDLIM5	HPGDS	SMARCAD1	PDLIM5	1.56755	HPGDS	0.759009	SMARCAD1	0.0759133			PDLIM5	-
rs223350	35	24	4:103778056:G:T	4	103778056	2.9793e-10	G	T	0.4841	-0.0788703	0.0125194	UBE2D3	intronic	1.6	NA	NA	NA	NA	0	NA	NA	UBE2D3	UBE2D3	MANBA	UBE2D3	SLC9B1	UBE2D3	0.870809	CISD2	0.657731	SLC9B1	0.494002			UBE2D3	-
rs6843082	36	25	4:111718067:A:G	4	111718067	1.76778e-10	G	A	0.2535	-0.0881968	0.0138234	RP11-777N19.1	ncRNA_exonic	13.54	NA	NA	NA	NA	0	NA	NA	PITX2	PITX2	PITX2	ENPEP	-	PITX2	-0.191781	ENPEP	-0.213526	-	-			PITX2	-
rs10487613	37	26	5:56976098:A:G	5	56976098	4.3495e-16	A	G	0.2028	-0.125128	0.0153939	AC008780.1	intergenic	1.331	NA	NA	NA	NA	0	NA	NA	ACTBL2	ACTBL2	ACTBL2	-	-	MAP3K1	0.419547	GAPT	0.335311	PLK2	0.284207			ACTBL2	-
rs72801474	38	27	5:132444128:A:G	5	132444128	1.37133e-10	G	A	0.06859	-0.160384	0.0249857	HSPA4	intergenic	0.703	NA	NA	NA	NA	0	NA	NA	HSPA4	HSPA4	HSPA4	SLC22A5	AFF4	HSPA4	1.80533	UQCRQ	0.360433	SHROOM1	0.179321		HSPA4	HSPA4	-
rs11242465	39	28	5:138762305:G:T	5	138762305	9.92732e-20	T	G	0.3022	0.125559	0.0138133	DNAJC18	intronic	6.592	NA	NA	NA	NA	1	PROB1:nonsynonymous SNV (5:138730037:C:T,r2=0.961957); SPATA24:nonsynonymous SNV (5:138732579:C:T,r2=0.681983); SLC23A1:stopgain (5:138720108:C:T,r2=0.792601)	PROB1; SPATA24; SLC23A1	DNAJC18	DNAJC18	SPATA24	DNAJC18	STING1	SIL1	0.620666	DNAJC18	0.537971	SLC23A1	0.418084		DNAJC18	DNAJC18	-
rs11167845	40	29	5:143520377:A:G	5	143520377	2.616e-10	A	G	0.2982	0.0881771	0.0139521	RN7SL87P	upstream	0.467	NA	NA	NA	NA	0	NA	NA	YIPF5	YIPF5	YIPF5	KCTD16	HMHB1	YIPF5	0.548155	KCTD16	0.0293116	HMHB1	-0.0791589			YIPF5	-
rs3176326	41	30	6:36647289:A:G	6	36647289	2.32967e-31	G	A	0.173	-0.184892	0.0158723	CDKN1A	intronic	10.88	NA	NA	NA	NA	0	NA	NA	CDKN1A	CDKN1A	CDKN1A	RAB44	CPNE5	CDKN1A	0.431741	PIM1	0.413578	CPNE5	0.394148			CDKN1A	-
rs13194096	42	30	6:36679830:A:G	6	36679830	2.33653e-09	A	G	0.3042	0.0815586	0.0136557	RAB44	intergenic	4.508	NA	NA	NA	NA	0	NA	NA	RAB44	RAB44	RAB44	CDKN1A	ETV7	CDKN1A	0.431741	PIM1	0.413578	CPNE5	0.394148			CDKN1A	-
rs625899	43	31	6:53957588:C:T	6	53957588	1.20352e-11	T	C	0.3131	-0.0908471	0.0133997	MLIP	intronic	4.142	NA	NA	NA	NA	0	NA	NA	MLIP	MLIP	MLIP	TINAG	LRRC1	MLIP	1.74029	TINAG	0.299315	KLHL31	0.133185			MLIP	-
rs205653	44	32	6:91212135:A:C	6	91212135	2.61973e-09	C	A	0.3847	0.0764476	0.0128401	MAP3K7	intergenic	1.334	NA	NA	NA	NA	0	NA	NA	MAP3K7	MAP3K7	MAP3K7	GJA10	BACH2	MAP3K7	1.10395	MDN1	0.0631543	BACH2	-0.106958			MAP3K7	-
rs57912492	45	33	6:118702621:C:T	6	118702621	2.56041e-09	C	T	0.4274	0.0749091	0.0125738	SLC35F1	intergenic	0.062	NA	NA	NA	NA	1	NA	NA	PLN	PLN	SLC35F1	CEP85L	PLN	PLN	1.58711	CEP85L	0.408376	SLC35F1	0.265639			PLN	-
rs11769224	46	34	7:46630354:A:C	7	46630354	4.82127e-09	A	C	0.4443	-0.0753935	0.0128807	HMGN1P19	intergenic	1.685	NA	NA	NA	NA	0	NA	NA	IGFBP3	IGFBP3	-	-	-	IGFBP3	0.167721	TNS3	0.127484	IGFBP1	-0.222441			IGFBP3	-
rs12705437	47	35	7:107633517:C:T	7	107633517	3.65858e-10	T	C	0.4483	-0.0796394	0.0127058	LAMB1	intronic	2.743	NA	NA	NA	NA	0	NA	NA	LAMB1	LAMB1	LAMB1	DLD	LAMB4	LAMB1	1.48979	NRCAM	0.125914	SLC26A3	0.114233			LAMB1	-
rs4731517	48	36	7:128458649:A:C	7	128458649	4.0653e-29	C	A	0.1113	-0.214124	0.0191178	CCDC136	intronic	9.475	NA	NA	NA	NA	0	NA	NA	FLNC	FLNC	CCDC136	IRF5	FLNC	FLNC	2.78013	CCDC136	0.783801	HILPDA	0.527624	CCDC136		FLNC	-
rs67146188	49	37	8:11782433:A:G	8	11782433	8.19931e-11	A	G	0.4235	0.0962561	0.0148157	OR7E161P	intergenic	2.049	NA	NA	NA	NA	0	NA	NA	DEFB136	DEFB136	FAM167A	FDFT1	BLK	GATA4	1.6989	BLK	0.463516	CTSB	0.438037			GATA4	-
rs2613208	50	38	8:95247830:A:G	8	95247830	1.90003e-08	A	G	0.4523	0.0704949	0.0125417	GEM	intergenic	1.445	NA	NA	NA	NA	0	NA	NA	CDH17	CDH17	GEM	CDH17	FSBP	GEM	1.1136	KIAA1429	0.0908962	RBM12B	0.0863393			GEM	-
rs7835298	51	39	8:124552303:A:G	8	124552303	3.93936e-11	G	A	0.4354	-0.081154	0.0122843	FBXO32	intronic	8.254	NA	NA	NA	NA	0	NA	NA	FBXO32	FBXO32	FBXO32	FAM91A1	NTAQ1	FBXO32	1.23926	WDYHV1	0.203571	FAM83A	0.187482		FBXO32	FBXO32	-
rs7461129	52	40	8:125861374:C:T	8	125861374	4.5371e-29	C	T	0.337	-0.14948	0.0133577	RP11-1082L8.3:LINC00964	ncRNA_intronic	4.178	NA	NA	NA	NA	0	NA	NA	MTSS1	MTSS1	MTSS1	SQLE	ZNF572	MTSS1	0.562615	NDUFB9	0.294765	NSMCE2	0.218674			MTSS1	-
rs4749423	53	41	10:29717839:A:G	10	29717839	3.34443e-10	A	G	0.2465	0.0861072	0.0137072	PTCHD3P1	ncRNA_intronic	5.165	NA	NA	NA	NA	0	NA	NA	LYZL1	LYZL1	SVIL	LYZL1	-	SVIL	1.72025	LYZL1	-0.397786	-	-			SVIL	-
rs10824026	54	42	10:75421208:A:G	10	75421208	2.3334e-10	G	A	0.16	0.105567	0.0166573	SYNPO2L:RP11-464F9.21	ncRNA_intronic	0.412	NA	NA	NA	NA	1	SYNPO2L:nonsynonymous SNV (10:75406912:G:T,r2=0.791627); SYNPO2L:nonsynonymous SNV (10:75415677:C:T,r2=0.834247); SYNPO2L:nonsynonymous SNV (10:75407290:A:G,r2=0.791627)	SYNPO2L	SYNPO2L	SYNPO2L	SYNPO2L	MYOZ1	NDST2	VCL	0.825626	MYOZ1	0.816768	PPP3CB	0.768811			SYNPO2L	-
rs72840788	55	43	10:121415685:A:G	10	121415685	7.29704e-95	G	A	0.2187	-0.327857	0.0158661	BAG3	intronic	0.73	NA	NA	NA	NA	1	BAG3:nonsynonymous SNV (10:121429633:C:T,r2=1)	BAG3	BAG3	BAG3	MCMBP	BAG3	INPP5F	BAG3	1.78609	GRK5	0.548579	RGS10	0.48837			BAG3	-
rs112029	56	43	10:121440528:C:T	10	121440528	1.19651e-16	C	T	0.1938	0.126951	0.0153259	TXNP1	intergenic	11.07	NA	NA	NA	NA	0	NA	NA	BAG3	BAG3	BAG3	SEC23IP	INPP5F	BAG3	1.78609	GRK5	0.548579	RGS10	0.48837			BAG3	-
rs1969539	57	44	11:14038621:A:G	11	14038621	3.06088e-11	A	G	0.495	0.0820458	0.0123496	SPON1	ncRNA_intronic	1.8	NA	NA	NA	NA	0	NA	NA	SPON1	SPON1	SPON1	COPB1	FAR1	RRAS2	0.757849	FAR1	0.0778817	COPB1	-0.046727		SPON1	SPON1	-
rs11025059	58	45	11:19234797:A:G	11	19234797	1.85462e-08	G	A	0.2247	0.0824298	0.0146541	RP11-428C19.4	ncRNA_intronic	3.384	NA	NA	NA	NA	0	NA	NA	CSRP3	CSRP3	CSRP3	MRGPRX2	E2F8	CSRP3	1.51069	NAV2	0.379509	E2F8	0.0457146			CSRP3	-
rs658286	59	46	11:100942792:G:T	11	100942792	4.07936e-08	T	G	0.5	-0.0687404	0.012527	PGR	intronic	1.676	NA	NA	NA	NA	0	NA	NA	PGR	PGR	PGR	ARHGAP42	-	PGR	1.59633	TMEM133	-0.100395	ARHGAP42	-0.228206			PGR	-
rs1466467	60	47	12:26330372:A:G	12	26330372	4.35806e-09	A	G	0.1392	0.0967453	0.0164813	SSPN	intronic	0.514	NA	NA	NA	NA	0	NA	NA	BHLHE41	BHLHE41	SSPN	BHLHE41	RASSF8	SSPN	0.98161	BHLHE41	0.905246	RASSF8	0.272131		SSPN; BHLHE41	SSPN	-
rs6490242	61	48	12:119610739:C:T	12	119610739	7.93553e-13	C	T	0.2753	0.102728	0.014343	RP11-64B16.3	intergenic	2.252	NA	NA	NA	NA	0	NA	NA	HSPB8	HSPB8	HSPB8	CCDC60	SRRM4	HSPB8	1.03373	PRKAB1	0.168799	SRRM4	-0.0324598			HSPB8	-
rs76382809	62	48	12:120671647:C:T	12	120671647	1.24858e-08	C	T	0.0169	0.258874	0.0454726	PXN	intronic	3.796	NA	NA	NA	NA	0	NA	NA	PXN	PXN	PXN	GCN1	PRKAB1	PXN	0.514968	CCDC64	0.453836	RPLP0	0.317253			HSPB8	-
rs74800104	63	49	14:53313097:C:T	14	53313097	4.90271e-11	C	T	0.2058	-0.108695	0.0165344	FERMT2	intergenic	7.716	NA	NA	NA	NA	1	FERMT2:nonsynonymous SNV (14:53348540:G:T,r2=0.976082)	FERMT2	GNPNAT1	GNPNAT1	ERO1A	FERMT2	GNPNAT1	FERMT2	1.01293	GNPNAT1	0.238719	STYX	0.162033			FERMT2	-
rs4904560	64	50	14:89855960:A:G	14	89855960	9.148e-10	G	A	0.496	-0.0755375	0.0123355	FOXN3	intronic	1.036	NA	NA	NA	NA	0	NA	NA	FOXN3	FOXN3	FOXN3	EFCAB11	-	FOXN3	0.483921	PTPN21	0.289975	ZC3H14	0.14793	FOXN3		FOXN3	-
rs2277547	65	51	15:79082431:A:G	15	79082431	1.81681e-12	A	G	0.2734	-0.0936627	0.0132895	ADAMTS7	intronic	0.312	NA	NA	NA	NA	1	ADAMTS7:nonsynonymous SNV (15:79058013:C:T,r2=0.673865)	ADAMTS7	MORF4L1	MORF4L1	ADAMTS7	CHRNB4	MORF4L1	MORF4L1	0.405096	CTSH	0.39058	ADAMTS7	0.280723			ADAMTS7	MORF4L1
rs35630683	66	52	15:85349231:C:T	15	85349231	4.06226e-14	T	C	0.2614	0.106236	0.0140543	ZNF592	UTR3	11.99	NA	NA	NA	NA	1	NMB:nonsynonymous SNV (15:85200520:G:T,r2=0.938743); ALPK3:nonsynonymous SNV (15:85383145:C:G,r2=0.924927); ALPK3:nonsynonymous SNV (15:85383640:A:G,r2=0.924927)	NMB; ALPK3	ALPK3	ALPK3	ALPK3	ZNF592	NMB	ALPK3	0.885375	NMB	0.567712	ZNF592	0.274278			ALPK3	-
rs4470148	67	53	16:1002328:C:T	16	1002328	1.83229e-12	T	C	0.01193	-0.103462	0.0146824	LMF1	intronic	4.785	NA	NA	NA	NA	0	NA	NA	LMF1	LMF1	LMF1	SOX8	SSTR5	UBE2I	1.58244	SOX8	1.31768	LMF1	1.01851	UBE2I		LMF1	-
rs4984617	68	53	16:1007268:A:G	16	1007268	2.4792e-19	G	A	0.3757	-0.114864	0.0127773	LMF1	intronic	2.622	NA	NA	NA	NA	1	NA	NA	LMF1	LMF1	LMF1	SOX8	SSTR5	UBE2I	1.58244	SOX8	1.31768	LMF1	1.01851	UBE2I		LMF1	-
rs60227059	69	54	16:67455858:C:T	16	67455858	1.73276e-08	T	C	0.1153	-0.137098	0.0243221	ZDHHC1	intergenic	1.184	NA	NA	NA	NA	1	PLEKHG4:nonsynonymous SNV (16:67318242:A:G,r2=0.651343)	PLEKHG4	ZDHHC1	ZDHHC1	ATP6V0D1	ZDHHC1	LRRC36	RRAD	1.34544	HSD11B2	0.639387	SLC9A5	0.507621			RRAD	-
rs12452627	70	55	17:1302472:A:G	17	1302472	3.08419e-09	G	A	0.08052	-0.131768	0.0222316	YWHAE	intronic	10.67	NA	NA	NA	NA	0	NA	NA	YWHAE	YWHAE	YWHAE	CRK	INPP5K	CRK	0.769547	MYO1C	0.613806	YWHAE	0.566014			YWHAE	-
rs242557	71	56	17:44019712:A:G	17	44019712	4.44317e-09	G	A	0.3857	0.0737599	0.0125724	MAPT	intronic	17.17	NA	NA	NA	NA	0	NA	NA	MAPT	MAPT	MAPT	KANSL1	ARL17A	MAPT	0.620411	KANSL1	0.212177	PLEKHM1	0.171534		MAPT	MAPT	-
rs12452367	72	57	17:53374610:C:T	17	53374610	1.8403e-14	T	C	0.2773	-0.10613	0.0138527	HLF	intronic	3.2	NA	NA	NA	NA	0	NA	NA	HLF	HLF	HLF	COX11	STXBP4	HLF	1.00518	MMD	0.108341	COX11	0.0866384			HLF	-
rs9892651	73	58	17:64303793:C:T	17	64303793	2.02436e-22	C	T	0.4672	-0.120144	0.0123344	PRKCA	intronic	1.254	NA	NA	NA	NA	0	NA	NA	PRKCA	PRKCA	PRKCA	APOH	CEP112	PRKCA	2.98986	APOH	0.725929	CEP112	-0.0305284			PRKCA	-
rs1996141	74	59	18:33924881:C:T	18	33924881	5.95641e-09	T	C	0.2316	-0.0835682	0.0143638	FHOD3	intronic	1.452	NA	NA	NA	NA	0	NA	NA	FHOD3	FHOD3	FHOD3	MOCOS	SLC39A6	FHOD3	1.85326	RPRD1A	0.0647825	C18orf21	-0.0343116			FHOD3	-
rs2848901	75	59	18:34232610:C:T	18	34232610	1.58926e-16	C	T	0.2863	-0.119939	0.0145387	FHOD3	exonic	12.81	exonic	FHOD3	nonsynonymous SNV	exon12	1	FHOD3:nonsynonymous SNV (18:34232610:C:T,r2=1)	FHOD3	KIAA1328	KIAA1328	TPGS2	KIAA1328	FHOD3	FHOD3	1.85326	TPGS2	-0.0580524	KIAA1328	-0.106486			FHOD3	-
rs6566955	76	60	18:55922789:A:G	18	55922789	4.70962e-12	A	G	0.327	-0.0933038	0.0134948	NEDD4L	intronic	22.2	NA	NA	NA	NA	0	NA	NA	NEDD4L	NEDD4L	NEDD4L	ALPK2	MALT1	NEDD4L	2.72154	ALPK2	0.488193	MALT1	0.27058			NEDD4L	-
rs10871753	77	60	18:55956865:G:T	18	55956865	1.00429e-19	G	T	0.4801	-0.111319	0.0122484	NEDD4L	intronic	10.74	NA	NA	NA	NA	0	NA	NA	NEDD4L	NEDD4L	NEDD4L	ALPK2	MALT1	NEDD4L	2.72154	ALPK2	0.488193	MALT1	0.27058			NEDD4L	-
rs113996837	78	61	19:46358957:A:G	19	46358957	7.84576e-11	A	G	0.162	0.106788	0.0164201	SYMPK	UTR5	1.332	NA	NA	NA	NA	0	NA	NA	SYMPK	SYMPK	SYMPK	RSPH6A	SIX5	VASP	1.0396	DMPK	0.683206	FOSB	0.407834			SYMPK	VASP
rs4616	79	62	20:33590358:C:T	20	33590358	6.19602e-10	C	T	0.4841	0.0776794	0.0125586	TRPC4AP	UTR3	2.584	NA	NA	NA	NA	0	NA	NA	GSS	GSS	TRPC4AP	GSS	ACSS2	MAP1LC3A	0.611304	NCOA6	0.608687	PROCR	0.498347			GSS	-
rs62222424	80	63	21:30530131:A:G	21	30530131	6.0639e-14	G	A	0.06461	0.208916	0.0278307	MAP3K7CL	intronic	2.523	NA	NA	NA	NA	0	NA	NA	BACH1	BACH1	CCT8	MAP3K7CL	LTN1	BACH1	1.00943	MAP3K7CL	0.839167	LTN1	0.376537			BACH1	-
rs2832296	81	63	21:30741454:A:G	21	30741454	9.21849e-09	A	G	0.3559	-0.0722381	0.0125751	BACH1	intronic	3.419	NA	NA	NA	NA	0	NA	NA	BACH1	BACH1	RWDD2B	MAP3K7CL	CCT8	BACH1	1.00943	MAP3K7CL	0.839167	LTN1	0.376537			BACH1	-
rs8134638	82	64	21:40644170:C:T	21	40644170	1.38894e-09	T	C	0.4125	-0.0766666	0.012658	BRWD1	intronic	3.376	NA	NA	NA	NA	1	BRWD1:nonsynonymous SNV (21:40670460:C:G,r2=0.752757); PSMG1:stoploss (21:40552307:A:G,r2=0.754813)	BRWD1; PSMG1	BRWD1	BRWD1	HMGN1	PSMG1	GET1	SH3BGR	0.597242	BRWD1	0.4225	PSMG1	0.409852			BRWD1	-
rs5760054	83	65	22:24161717:C:T	22	24161717	1.61471e-30	C	T	0.1889	0.182836	0.0159229	SMARCB1	intronic	7.878	NA	NA	NA	NA	1	DERL3:nonsynonymous SNV (22:24179132:A:G,r2=0.653242)	DERL3	DERL3	DERL3	VPREB3	CHCHD10	SMARCB1	CHCHD10	1.29006	MMP11	1.15523	DERL3	1.09882		MMP11	DERL3	-
Note: OpenTargets queries on October 9th 2023. P-values and other GWAS statistics were derived from MTAG analysis of inverse-variance-weighted meta-analysis of logistic regression models. P-values are two-sided and unadjusted for multiple testing. Abbreviations: GWAS, genome-wide association study; MTAG, multi-trait analysis of GWAS; DCM, dilated cardiomyopathy; FUMA, Functional Mapping and Annot…

[truncated: 31 more sheets: ST11 MTAG-DCM loci merged GWAS , ST12 MTAG-DCM novelty loci LVHF, ST13 GWAS-DCM replication, ST14 MTAG-DCM replication , ST15 GWAS-DCM loci heterogeneit, ST16 MTAG-DCM loci heterogeneit, ST17 Cell type enrichments, ST18 eQTLpQTL MR, ST19 PoPS top 200, ST20 GWAS-DCM gene prioritizati, ST21 MTAG-DCM gene prioritizati, ST22 Pathway enrich -prio genes, ST23 Pathway enrichment -MAGMA , ST24 snscRNAseq LV gene express, ST25 snscRNAseq DCMNF diff.expr, ST26 Selected therapeutic targe, ST27 MR screen trait<->DCM , ST28 MR multivariable , ST29 MR CAUSE, ST30 AllofUs Baseline character …]
